# Supplementary material
Source: PubMed Central journal article supplement (PMC2987635)
Supplement: NIHMS242689-supplement-01.pdf [file NIHMS242689-supplement-01.pdf]

## SUPPLEMENTAL INFORMATION

Friedreich's Ataxia Induced Pluripotent Stem Cells

Model Intergenerational GAA•TTC Triplet-Repeat Instability

Sherman Ku, Elisabetta Soragni, Erica Campau, Elizabeth A. Thomas, Gulsah Altun, Louise C.

Laurent, Jeanne F. Loring, Marek Napierala, and Joel M. Gottesfeld

## SUPPLEMENTAL DATA

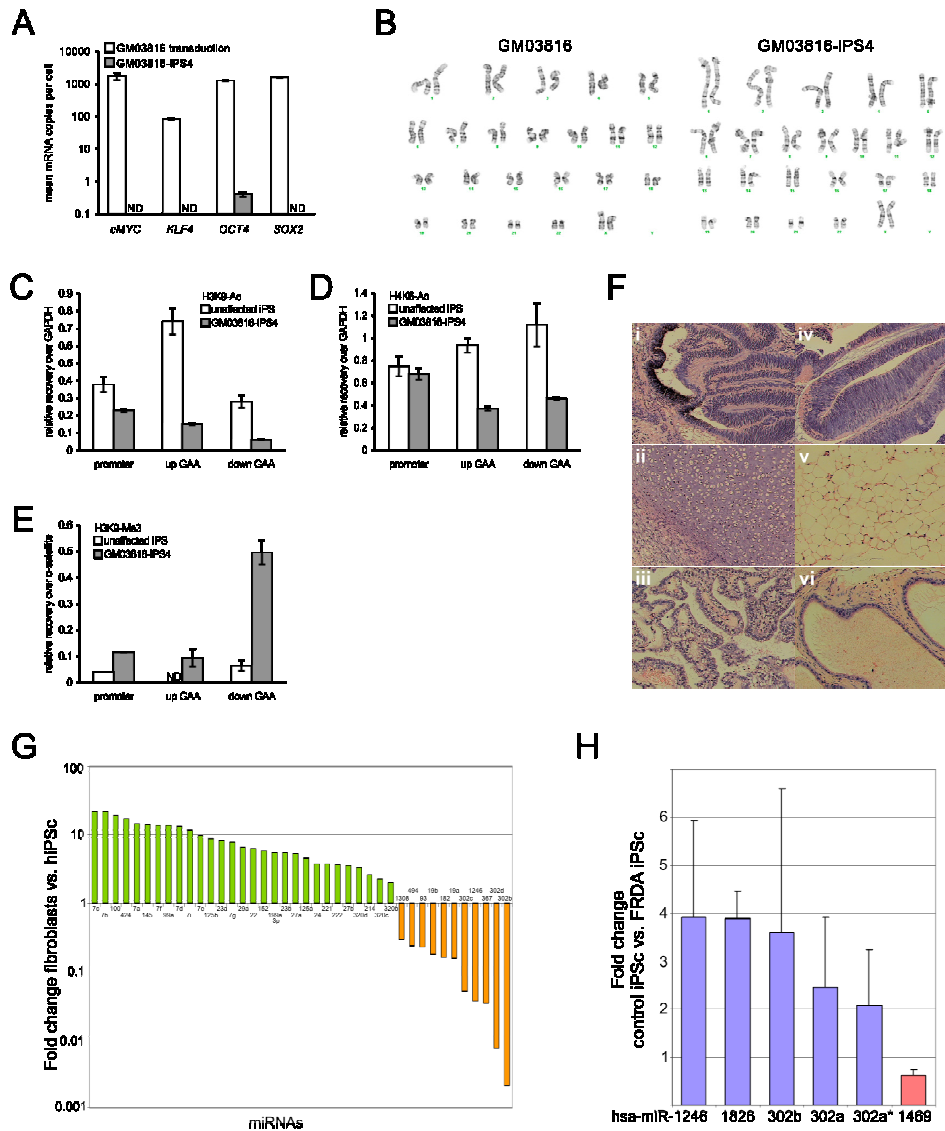

**Figure S1.** Molecular characterization of FRDA iPSCs (related to Figure 1).

**(A)** Absolute quantitative RT-PCR analysis of the expression levels of retrovirally expressed transcription factors used during reprogramming in GM03816-iPS4 compared to GM03816 fibroblasts at day 4 after transduction with the four reprogramming vectors. Quantitation of the levels of the retroviral encoded RNAs reveals no detectable presence of *cMYC*, *KLF4*, and *SOX2* transcripts and 0.3 – 0.5 transcripts of *OCT4* per cell, which is at or near the background level of detection in our assays. ND, not detected.

**(B)** Metaphase spread of FRDA donor fibroblasts GM03816 and FRDA iPSC line GM03816-iPS4.

**(C – E)** Quantitative ChIP data of H3K9 acetylation **(A)**, H4K5 acetylation **(B)**, and H3K9 trimethylation **(C)** at the promoter of the *FXN* gene as well as regions directly upstream (up GAA) and downstream (down GAA) of the intronic GAA•TTC repeat expansion. Error bars = SEM of triplicate measurement; ND, not detected.

**(F)** Representative *in vivo* differentiation assay for assessing the pluripotency of FRDA iPSCs. Teratoma tissue sections were H&E stained and imaged by brightfield microscopy.

Differentiated tissues were found representing ectoderm (neural tissue, panels i and iv), mesoderm (cartilage, panel ii; adipose tissue, panel v), and endoderm (gut epithelia, panel iii; thyroid-like gland, panel vi).

**(G)** Differentially expressed miRNAs as compared between GM03816-iPS4 and fibroblasts (FRDA and normal). Eleven miRNAs were upregulated, and 29 miRNAs were down-regulated. Green bars denote higher expression in fibroblasts, orange bars denote higher expression in GM03816-iPS4.

**(H)** Differentially expressed miRNAs as compared between the FRDA iPSC line GM03816-iPS4 and an unaffected iPSC line. Blue bars represent miRNAs with greater expression in unaffected iPSCs, and the red bar represents a miRNA with greater expression in GM03816-iPS4.

**Table S1.** Functional clustering of genes differentially expressed in FRDA iPSCs compared to unaffected pluripotent stem cells (related to Figure 1). The top significant annotation clusters are shown. The enrichment score for each group is based on the EASE scores (modified exact Fisher's p-value) for each term member. The p-values were determined by the Fisher Exact Probability Value for gene-enrichment analysis.

(Excel file attached as KuTableS1.xls)

**Table S2.** Significant enrichment of Gene Ontology terms (Biological Process) in FRDA iPSCs (related to Figure 1). Differentially expressed genes between database iPSCs and FRDA iPSCs are listed that meet a GO analysis significance criteria of  $p < 0.05$ .

(Excel file attached as KuTableS2.xls)

**Table S3.** Simple normalized data from miRNA expression analysis (related to Figure 1). Signal intensity data were LOWESS normalized to compensate for chip effects. Normalized data for all probes are listed.

(Excel file attached as KuTableS3.xls)

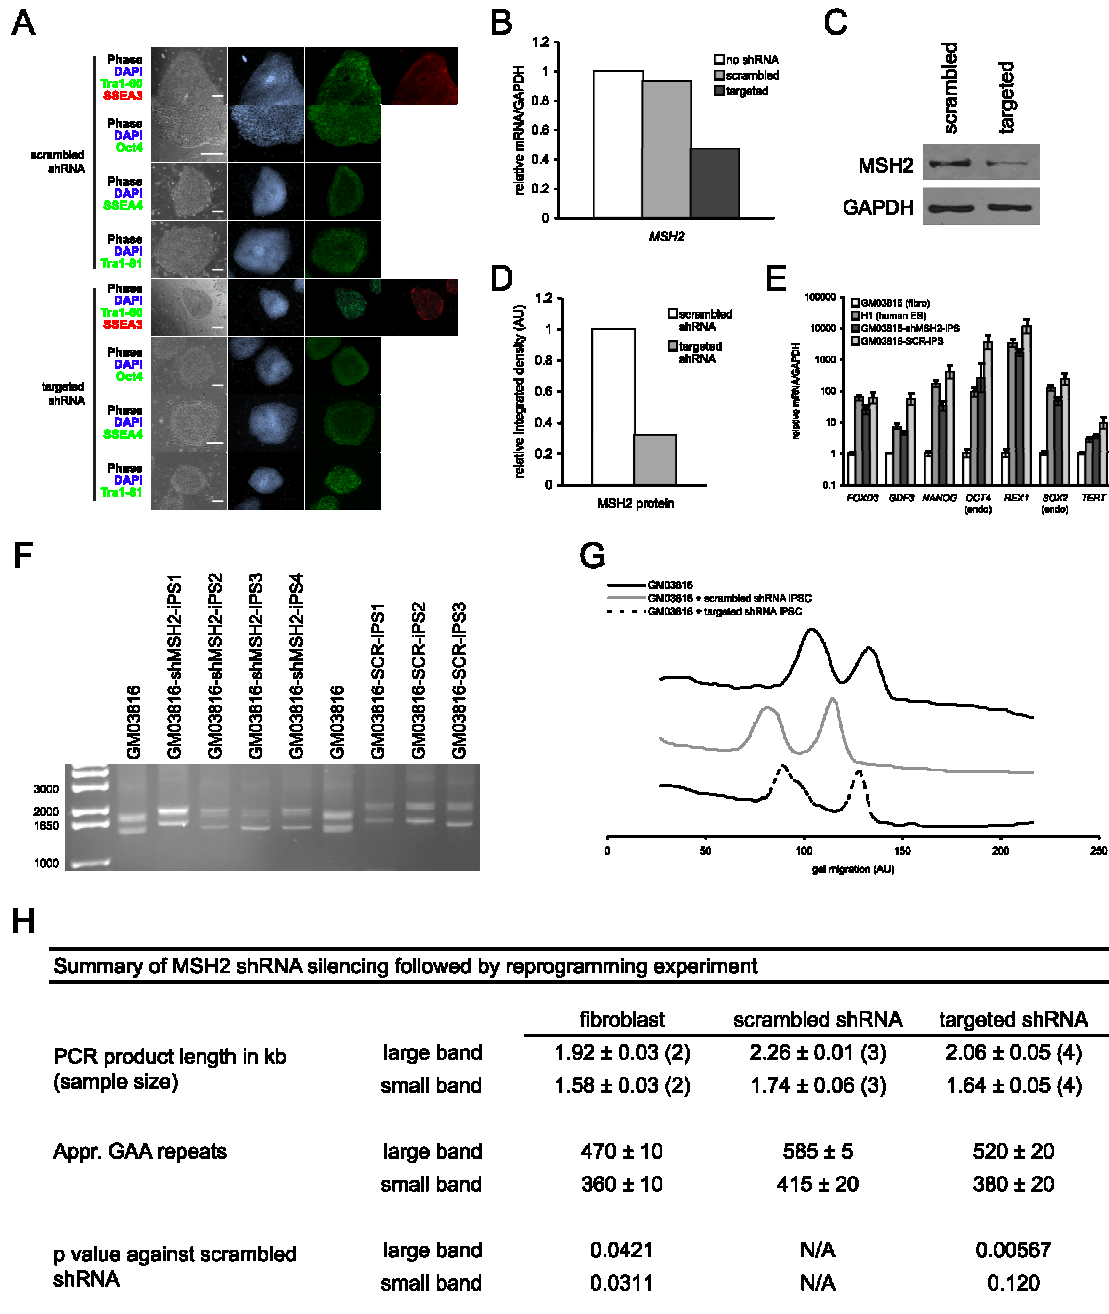

**Figure S2.** shRNA silencing of *MSH2* in FRDA iPSCs and fibroblasts (related to Figure 4).

**(A)** Contrast enhanced immunostaining of pluripotency markers of GM03816-iPS4 FRDA iPSCs with stable *MSH2*-targeted shRNA and a scrambled shRNA control. Phase contrast (gray); nuclear staining (blue); pluripotency markers staining (green and red) is as denoted by the

colored text labels. Tra1-60 and Tra1-81, surface markers; SSEA-3 and -4, stage-specific embryonic antigens; Oct4, transcription factor. Scale bars = 0.25 mm.

**(B)** *MSH2* mRNA levels of targeted and scrambled shRNA-expressing GM03816 FRDA fibroblasts.

**(C)** Western blot of MSH2 protein in GM03816 FRDA fibroblasts with scrambled shRNA and targeted shRNA. GAPDH, loading control.

**(D)** Densitometric analysis of MSH2 protein normalized to GAPDH of previous panel.

**(E)** Quantitative RT-PCR analysis of various pluripotency mRNAs in reprogrammed shRNA-expressing GM03816 FRDA fibroblasts, white bars; H1 hESCs, medium grey; reprogrammed GM03816 fibroblasts expressing *MSH2*-targeted shRNA (GM03816-shMSH2-IPS), dark grey; reprogrammed GM03816 fibroblasts expressing a scrambled shRNA control (GM03816-SCR-IPS), light grey. Error bars = SEM of duplicate measurements.

**(F)** PCR analysis of GAA•TTC repeat lengths of GM03816 FRDA fibroblasts and corresponding shRNA-expressing iPSC clones. Lanes are the following (left to right): GM03816 FRDA fibroblasts (GM03816), four *MSH2*-targeted shRNA-expressing iPSC clones (GM03816-shMSH2-iPS1 to 4), GM03816 FRDA fibroblasts, three scrambled shRNA-expressing iPSC clones (GM03816-SCR-iPS1 to 3).

**(G)** Signal intensity traces of ethidium-stained agarose gel from panel F. Higher migration represents smaller PCR bands (traces are from single samples and are not representative of pooled data). Traces of PCR products from GM03816 FRDA fibroblasts, solid black line; from reprogrammed GM03816 fibroblasts expressing a scrambled shRNA control, solid grey line; from reprogrammed GM03816 fibroblasts expressing *MSH2*-targeted shRNA, dashed black line.

**(H)** Summary of pooled repeat GAA•TTC repeat length data.

## SUPPLEMENTAL EXPERIMENTAL PROCEDURES

### Generation of viruses

Phoenix-amphotropic cells were transfected overnight with reprogramming retrovirus plasmids using the Fugene6 reagent (Roche) according to the manufacturer. After initial transfection, cells were incubated at 32°C for 48 h, with virus-containing supernatant collected every twelve hours. Plasmids used included the four described by Takahashi and colleagues (Takahashi et al., 2007) (pMXs-cMyc, pMXs-KLF4, pMXs-Oct4, pMXs-Sox2; obtained from Addgene).

Additionally, a VSV-g plasmid was used, a generous gift from the laboratory of W. Balch.

Lentiviral shRNA constructs were generated by cloning an *MSH2*-targeted oligonucleotide (5'-CCGGATGGAGAATCAGGTTGCAGTTTCATCACTTCAAGAGAGTGATGAAACTGCAACCTGATTCTCCATTTTTTG-3') into the vector pLKO.1-puro (Sigma-Aldrich) at AgeI and EcoRI sites downstream of the U6 promoter. A vector containing a scrambled sequence shRNA was obtained from Addgene (#1864). Lentiviral particles were then packaged by co-transfecting human 293 cells using Fugene6 reagent (Roche) with shRNA constructs along with psPAX2 and pMD2.G helper plasmids (both obtained from Addgene, #12260 and #12259, respectively) in hES media. Transfected cells were grown at 37°C for a total of 60 h, with lentivirus-containing supernatant collected every 24 h for the last 48 h. Both retroviral- and lentiviral-containing supernatant were filtered through a 0.45 µm cellulose-acetate mesh to remove any contaminating cells or cell debris.

### Immunocytochemistry

Primary antibodies Oct4, Tra1-60, Tra1-81, SSEA3, SSEA4, were obtained from Chemicon (MAB4305, MAB4360, MAB4381, MAB4303, and MAB4304) and were all used at 1:50 dilution except MAB4303 (used at 1:25). Fluorescent secondary antibodies were obtained from Santa Cruz Biotechnology (anti-mouse Texas Red conjugate, anti-mouse FITC conjugate, anti-rat

Texas Red conjugate, and anti-rat FITC conjugate). All secondary antibodies were used at 1:100 dilution.

### **Teratoma analysis**

One million iPSCs were injected into the left testes capsules of immunocompromised mice (NOD.CB17-Prkdc<sup>scid</sup>/J) as described (Gertow et al., 2007). Cells were allowed to grow and differentiated into teratomas for eight to twelve weeks, after which time animals were euthanized, and tumors were extracted. Subsequently, teratomas were fixed overnight in formalin, sectioned at a thickness of 3  $\mu$ m and mounted onto slides, and stained with hematoxylin and eosin. All animal work was approved by the Institutional Animal Care and Use Committee at The Scripps Research Institute.

### **Karyotype analysis**

Cultures were analyzed for karyotype through Cell Line Genetics.

### **PCR and quantitative RT-PCR**

Quantitation of PCR band sizes was performed using an inverse power function directly correlating gel migration of a molecular weight ladder to its known sizes. PCR products from the *FXN* locus contain 499 bp of non-repeat sequences, so GAA•TTC repeat number estimations were adjusted accordingly. For *FXN* GAA•TTC repeat amplification, the primers GAA-104F and GAA-629R were used (Rindler et al., 2006) in 20  $\mu$ L reactions cycled through the following conditions: 98°C denaturation for 5 sec, 70°C annealing for 15 sec, 72°C extension for 90 sec for forty cycles with a five minute initial denaturation and a five minute final extension using the Phusion enzyme (New England Biolabs). For amplification of other GAA•TTC-containing loci, Phusion enzyme was used with the following primers: 2q36F (5'-AAAAGGGCAACATGAACTACTG-3') and 2q36R (5'-ACTTTTGCCCAGAGATAACTC-3');

4q31.1F (5'-AGCTTTGCTAGGAACCAATATG-3') and 4q31.1R (5'-TGTCAGATAACTGAACTTGTAC-3') (Clark et al., 2006). Cycling conditions consisted of a 98°C denaturation for 5 sec, 64°C annealing for 15 sec, 72°C extension for 15 sec for 35 cycles with a 5 min initial denaturation and a 5 min final extension. Primers used for qRT-PCR are as follows: FXN-F (5'-CAGAGGAAACGCTGGGACTCT-3') and FXN-R (5'-AGCCAGATTTGCTTGTGG-3') (Herman et al., 2006). Pluripotent marker primer sequences are previously described (Huangfu et al., 2008; Park et al., 2008). Additionally, *MSH2*, *MSH3*, and *OGG1* levels were probed with the following primers: MSH2\_RT02F (5'-GGAAAAGAAGATGCAGTCAACA-3'), MSH2\_RT02R (5'-CAAACGTGCACTGGAATCC-3'); MSH3\_RT03F (5'-CACATGGGATTCTTGGTCAGT-3'), MSH3\_RT03R (5'-GCTGCAATTCCTCTAGTTATTTGG-3'); OGG1\_RT04F (5'-GCAGCTACGAGAGTCCTCATAT-3'), and OGG1\_RT04R (5'-GCTTGTCTAGGGCCATCA-3'). All qRT-PCR signals were normalized to *GAPDH* (forward primer, 5'-GAGTCAACGGATTTGGTCGT-3'; reverse primer, 5'-GAGGTCAATGAAGGGGTCAT-3'). Reverse transcription was performed at 50°C for 20 min, followed by PCR cycling at 95°C for 30 sec, 55°C for 30 sec, and 72°C for 30 sec for 40 cycles.

### **Western analysis**

Blocking, antibody incubation, and washes were performed in 5% milk in TBST (137 mM NaCl, 2.7 mM KCl, 25 mM Tris, 0.1% Tween-20). Washes after primary and secondary antibody incubation consisted of three 5 min washes. MSH2 and GAPDH antibodies were obtained from Abcam (ab52266 and ab9484, respectively) and were used at 1:4000 and 1:1000 dilutions, respectively. Ribosomal protein L13a antibody was obtained from Cell Signaling (2765S) and used at a 1:1000 dilution. Anti-mouse HRP secondary antibody was purchased from Santa Cruz Biotechnologies (sc-2005), and anti-rabbit HRP secondary antibody was purchased from Cell Signaling (7074). All secondary antibodies were used at a dilution of 1:1000.



## **Chromatin immunoprecipitation**

ChIP was performed as described with some modifications (Herman et al., 2006). For histone tail modification immunoprecipitations, cells were crosslinked as described, and for MMR enzyme immunoprecipitations, cells were first crosslinked with 1.5 mM dithiobis-succinimidyl propionate (DSP) for 20 min followed by 4% formaldehyde crosslinking as described. For PCR detection, the following primers were used: -1254-F (5'-AGTACCTTCCCATCTTCTCTGC-3') and -1254-R (5'-GTGAATAGCCACAGCATTCC-3'); 11482-F (5'-TCCAAGTTCCATTGGCCAGAAAGG-3') and 11482-R (5'-AAGGCCACACCACTAAGTTCTTCC-3'); SATA-F (5'-CTGCACTACCTGAAGAGGAC-3') and SATA-R (5'-GATGGTTCAACACTCTTACA-3') (Jiang et al., 2004). All other primers used are previously described (Herman et al., 2006).

## **MicroRNA analysis**

Total RNA including miRNA fraction was isolated using MiRNeasy Mini kit (Qiagen) according to manufacturer recommendations. Quality of RNA was determined using Nanodrop absorbance measurements and a 2100 Bioanalyzer (Agilent Technologies). All RNA samples used in microarray experiments demonstrated a RNA integrity number (RIN) of 10. MicroRNA microarray assays were performed using  $\mu$ Paraflo microfluidic chips (miR human 14.0 array chips based on Sanger miRBase release 14; LC Sciences) starting with 2- 5  $\mu$ g of total RNA sample. To allow direct comparison between different samples and avoid dye bias, all samples were labeled with the same dye (Cy3) and single chip hybridization was carried out for each sample. Raw data were normalized by the LOWESS method on the background-subtracted data. A Student's t-test was performed at a significance level of  $\alpha < 0.01$  to analyze the statistical significance of the signal differences between the groups (human iPSC versus human fibroblasts and FRDA iPSC versus control iPSC). Because low signal intensity affects reliability of microarray results, only data sets harboring at least one sample with average signal intensity

greater than 500 were considered. For selected miRNAs, validation of differential expression was conducted using TaqMan quantitative real-time PCR (Applied Biosystems) according to the manufacturer recommendations.

## **SUPPLEMENTAL REFERENCES**

Clark, R.M., Bhaskar, S.S., Miyahara, M., Dalgliesh, G.L., and Bidichandani, S.I. (2006).

Expansion of GAA trinucleotide repeats in mammals. *Genomics* 87, 57-67.

Gertow, K., Przyborski, S., Loring, J.F., Auerbach, J.M., Epifano, O., Otonkoski, T., Damjanov, I., and Ahrlund-Richter, L. (2007). Isolation of human embryonic stem cell-derived teratomas for the assessment of pluripotency. *Curr Protoc Stem Cell Biol Chapter 1, Unit1B.4*.

Herman, D., Jenssen, K., Burnett, R., Soragni, E., Perlman, S.L., and Gottesfeld, J.M. (2006).

Histone deacetylase inhibitors reverse gene silencing in Friedreich's ataxia. *Nat Chem Biol* 2, 551--558.

Huangfu, D., Osafune, K., Maehr, R., Guo, W., Eijkelenboom, A., Chen, S., Muhlestein, W., and Melton, D.A. (2008). Induction of pluripotent stem cells from primary human fibroblasts with only Oct4 and Sox2. *Nat Biotechnol* 26, 1269-1275.

Jiang, G., Yang, F., Sanchez, C., and Ehrlich, M. (2004). Histone modification in constitutive heterochromatin versus unexpressed euchromatin in human cells. *Journal of cellular biochemistry* 93, 286-300.

Park, I.-H., Zhao, R., West, J.A., Yabuuchi, A., Huo, H., Ince, T.A., Lerou, P.H., Lensch, M.W., and Daley, G.Q. (2008). Reprogramming of human somatic cells to pluripotency with defined factors. *Nature* 451, 141-146.

Rindler, P.M., Clark, R.M., Pollard, L.M., De Biase, I., and Bidichandani, S.I. (2006). Replication in mammalian cells recapitulates the locus-specific differences in somatic instability of genomic GAA triplet-repeats. *Nucl Acids Res* 34, 6352-6361.

Takahashi, K., Okita, K., Nakagawa, M., and Yamanaka, S. (2007). Induction of pluripotent stem cells from fibroblast cultures, pp. -3089.

**Table S1. Functional clustering of genes differentially expressed in FRDA iPS cells compared to normal pluripotent stem cells.**

| <b>Annotation Cluster 1:</b> |                                                  | <b>Enrichment Score: 15.002</b> |                                |                 |                         |             |
|------------------------------|--------------------------------------------------|---------------------------------|--------------------------------|-----------------|-------------------------|-------------|
| <b>Annotation Category:</b>  | <b>Annotation Term:</b>                          | <b># genes:</b>                 | <b>% of total in category:</b> | <b>P-Value:</b> | <b>Fold Enrichment:</b> | <b>FDR:</b> |
| GOTERM_CC                    | GO:0031974-membrane-enclosed lumen               | 372                             | 16.424                         | 1.17E-21        | 1.560                   | 1.76E-18    |
| GOTERM_CC                    | GO:0070013-intracellular organelle lumen         | 359                             | 15.850                         | 2.32E-21        | 1.571                   | 3.48E-18    |
| GOTERM_CC                    | GO:0043233-organelle lumen                       | 362                             | 15.982                         | 1.96E-20        | 1.548                   | 2.95E-17    |
| GOTERM_CC                    | GO:0031981-nuclear lumen                         | 288                             | 12.715                         | 1.20E-15        | 1.546                   | 1.83E-12    |
| GOTERM_CC                    | GO:0005654-nucleoplasm                           | 177                             | 7.815                          | 4.46E-10        | 1.562                   | 6.71E-07    |
| GOTERM_CC                    | GO:0044451-nucleoplasm part                      | 105                             | 4.636                          | 3.40E-05        | 1.473                   | 0.050988291 |
| <b>Annotation Cluster 2:</b> |                                                  | <b>Enrichment Score: 6.049</b>  |                                |                 |                         |             |
| <b>Annotation Category:</b>  | <b>Annotation Term:</b>                          | <b># genes:</b>                 | <b>% of total in category:</b> | <b>P-Value:</b> | <b>Fold Enrichment:</b> | <b>FDR:</b> |
| GOTERM_BP                    | GO:0006281-DNA repair                            | 70                              | 3.091                          | 2.65E-07        | 1.859                   | 4.92E-04    |
| GOTERM_BP                    | GO:0006259-DNA metabolic process                 | 108                             | 4.768                          | 3.75E-07        | 1.609                   | 6.96E-04    |
| GOTERM_BP                    | GO:0006974-response to DNA damage stimulus       | 85                              | 3.753                          | 4.67E-07        | 1.718                   | 8.67E-04    |
| SP_PIR_KEYWORDS              | dna repair                                       | 47                              | 2.075                          | 1.28E-06        | 2.098                   | 0.001932326 |
| GOTERM_BP                    | GO:0033554-cellular response to stress           | 115                             | 5.077                          | 2.00E-06        | 1.532                   | 0.003722577 |
| SP_PIR_KEYWORDS              | DNA damage                                       | 48                              | 2.119                          | 4.25E-06        | 1.996                   | 0.00641003  |
| <b>Annotation Cluster 3:</b> |                                                  | <b>Enrichment Score: 5.549</b>  |                                |                 |                         |             |
| <b>Annotation Category:</b>  | <b>Annotation Term:</b>                          | <b># genes:</b>                 | <b>% of total in category:</b> | <b>P-Value:</b> | <b>Fold Enrichment:</b> | <b>FDR:</b> |
| SP_PIR_KEYWORDS              | mitochondrion                                    | 153                             | 6.755                          | 1.15E-08        | 1.568                   | 1.73E-05    |
| GOTERM_CC                    | GO:0005739-mitochondrion                         | 201                             | 8.874                          | 2.81E-08        | 1.439                   | 4.22E-05    |
| SP_PIR_KEYWORDS              | transit peptide                                  | 97                              | 4.283                          | 5.86E-08        | 1.737                   | 8.84E-05    |
| UP_SEQ_FEATURE               | transit peptide:Mitochondrion                    | 92                              | 4.062                          | 8.14E-07        | 1.670                   | 0.001553832 |
| GOTERM_CC                    | GO:0044429-mitochondrial part                    | 114                             | 5.033                          | 8.29E-06        | 1.491                   | 0.012458482 |
| GOTERM_CC                    | GO:0005759-mitochondrial matrix                  | 51                              | 2.252                          | 7.57E-05        | 1.749                   | 0.113590451 |
| GOTERM_CC                    | GO:0031980-mitochondrial lumen                   | 51                              | 2.252                          | 7.57E-05        | 1.749                   | 0.113590451 |
| GOTERM_CC                    | GO:0005740-mitochondrial envelope                | 73                              | 3.223                          | 0.005522769     | 1.356                   | 7.98269258  |
| <b>Annotation Cluster 4:</b> |                                                  | <b>Enrichment Score: 4.901</b>  |                                |                 |                         |             |
| <b>Annotation Category:</b>  | <b>Annotation Term:</b>                          | <b># genes:</b>                 | <b>% of total in category:</b> | <b>P-Value:</b> | <b>Fold Enrichment:</b> | <b>FDR:</b> |
| SP_PIR_KEYWORDS              | protein transport                                | 105                             | 4.636                          | 5.08E-10        | 1.846                   | 7.66E-07    |
| GOTERM_BP                    | GO:0008104-protein localization                  | 168                             | 7.417                          | 5.60E-07        | 1.436                   | 0.001041072 |
| GOTERM_BP                    | GO:0045184-establishment of protein localization | 149                             | 6.578                          | 9.79E-07        | 1.461                   | 0.001819088 |
| GOTERM_BP                    | GO:0015031-protein transport                     | 147                             | 6.490                          | 1.51E-06        | 1.455                   | 0.002796457 |
| GOTERM_BP                    | GO:0046907-intracellular transport               | 130                             | 5.740                          | 1.74E-06        | 1.492                   | 0.003228339 |
| SP_PIR_KEYWORDS              | transport                                        | 238                             | 10.508                         | 7.46E-04        | 1.215                   | 1.119761515 |
| GOTERM_BP                    | GO:0034613-cellular protein localization         | 77                              | 3.400                          | 0.001427156     | 1.413                   | 2.618574789 |
| GOTERM_BP                    | GO:0070727-cellular macromolecule localization   | 77                              | 3.400                          | 0.001746088     | 1.402                   | 3.194822092 |
| GOTERM_BP                    | GO:0006886-intracellular protein transport       | 68                              | 3.002                          | 0.005692897     | 1.371                   | 10.06410611 |
| <b>Annotation Cluster 5:</b> |                                                  | <b>Enrichment Score: 4.806</b>  |                                |                 |                         |             |
| <b>Annotation Category:</b>  | <b>Annotation Term:</b>                          | <b># genes:</b>                 | <b>% of total in category:</b> | <b>P-Value:</b> | <b>Fold Enrichment:</b> | <b>FDR:</b> |
| SP_PIR_KEYWORDS              | nucleotide-binding                               | 274                             | 12.097                         | 6.41E-09        | 1.386                   | 9.66E-06    |
| SP_PIR_KEYWORDS              | atp-binding                                      | 219                             | 9.669                          | 7.67E-08        | 1.408                   | 1.16E-04    |
| GOTERM_MF                    | GO:000166-nucleotide binding                     | 368                             | 16.247                         | 5.07E-07        | 1.253                   | 8.40E-04    |
| GOTERM_MF                    | GO:0032553-ribonucleotide binding                | 297                             | 13.113                         | 2.75E-05        | 1.236                   | 0.045510595 |
| GOTERM_MF                    | GO:0032559-adenyl ribonucleotide binding         | 247                             | 10.905                         | 3.73E-05        | 1.261                   | 0.06166884  |
| GOTERM_MF                    | GO:0005524-ATP binding                           | 243                             | 10.728                         | 5.69E-05        | 1.257                   | 0.09421836  |
| GOTERM_MF                    | GO:0017076-purine nucleotide binding             | 304                             | 13.422                         | 9.87E-05        | 1.211                   | 0.163363359 |
| GOTERM_MF                    | GO:0030554-adenyl nucleotide binding             | 254                             | 11.214                         | 1.56E-04        | 1.231                   | 0.258601975 |
| GOTERM_MF                    | GO:0001882-nucleoside binding                    | 258                             | 11.391                         | 2.08E-04        | 1.223                   | 0.344093138 |
| UP_SEQ_FEATURE               | nucleotide phosphate-binding region:ATP          | 147                             | 6.490                          | 7.20E-04        | 1.295                   | 1.365711199 |
| <b>Annotation Cluster 6:</b> |                                                  | <b>Enrichment Score: 4.365</b>  |                                |                 |                         |             |
| <b>Annotation Category:</b>  | <b>Annotation Term:</b>                          | <b># genes:</b>                 | <b>% of total in category:</b> | <b>P-Value:</b> | <b>Fold Enrichment:</b> | <b>FDR:</b> |
| SP_PIR_KEYWORDS              | rna-binding                                      | 120                             | 5.298                          | 4.31E-12        | 1.895                   | 6.51E-09    |
| SMART                        | SM00360:RRM                                      | 49                              | 2.163                          | 9.95E-06        | 1.908                   | 0.013776677 |
| INTERPRO                     | IPR000504:RNA recognition motif, RNP-1           | 49                              | 2.163                          | 2.66E-05        | 1.848                   | 0.047158519 |
| INTERPRO                     | IPR012677:Nucleotide-binding, alpha-beta plait   | 47                              | 2.075                          | 1.45E-04        | 1.755                   | 0.257530744 |
| UP_SEQ_FEATURE               | domain:RRM 1                                     | 26                              | 1.148                          | 2.22E-04        | 2.182                   | 0.422713381 |
| UP_SEQ_FEATURE               | domain:RRM                                       | 24                              | 1.060                          | 0.011336554     | 1.709                   | 19.55490368 |
| UP_SEQ_FEATURE               | domain:RRM 3                                     | 10                              | 0.442                          | 0.128512484     | 1.695                   | 92.75769121 |
| <b>Annotation Cluster 7:</b> |                                                  | <b>Enrichment Score: 4.214</b>  |                                |                 |                         |             |

| Annotation Category: | Annotation Term:                              | # genes: | % of total in category: | P-Value:    | Fold Enrichment: | FDR:        |
|----------------------|-----------------------------------------------|----------|-------------------------|-------------|------------------|-------------|
| GOTERM_CC            | GO:0030529-ribonucleoprotein complex          | 119      | 5.254                   | 9.32E-11    | 1.799            | 1.40E-07    |
| GOTERM_BP            | GO:0006412-translation                        | 81       | 3.576                   | 3.81E-08    | 1.845            | 7.08E-05    |
| SP_PIR_KEYWORDS      | protein biosynthesis                          | 48       | 2.119                   | 3.10E-07    | 2.177            | 4.68E-04    |
| SP_PIR_KEYWORDS      | ribosomal protein                             | 47       | 2.075                   | 7.96E-07    | 2.132            | 0.001201458 |
| GOTERM_CC            | GO:0005840-ribosome                           | 51       | 2.252                   | 1.67E-05    | 1.847            | 0.025142551 |
| GOTERM_MF            | GO:0003735-structural constituent of ribosome | 42       | 1.854                   | 4.45E-05    | 1.910            | 0.073727362 |
| SP_PIR_KEYWORDS      | ribosome                                      | 22       | 0.971                   | 6.48E-05    | 2.570            | 0.097741219 |
| GOTERM_CC            | GO:0033279-ribosomal subunit                  | 33       | 1.457                   | 1.29E-04    | 2.007            | 0.193780801 |
| KEGG_PATHWAY         | hsa03010:Ribosome                             | 25       | 1.104                   | 0.001050194 | 1.975            | 1.298561887 |
| GOTERM_MF            | GO:0005198-structural molecule activity       | 106      | 4.680                   | 0.005522805 | 1.278            | 8.762266884 |
| GOTERM_BP            | GO:0006414-translational elongation           | 24       | 1.060                   | 0.005927105 | 1.792            | 10.45688556 |
| GOTERM_CC            | GO:0044445-cytosolic part                     | 31       | 1.369                   | 0.010208737 | 1.588            | 14.28520693 |
| GOTERM_CC            | GO:0015935-small ribosomal subunit            | 16       | 0.706                   | 0.012012764 | 1.977            | 16.60230564 |
| GOTERM_CC            | GO:0022626-cytosolic ribosome                 | 18       | 0.795                   | 0.026537729 | 1.730            | 33.23808574 |

**Annotation Cluster 8: Enrichment Score: 4.076**

| Annotation Category: | Annotation Term:                                  | # genes: | % of total in category: | P-Value:    | Fold Enrichment: | FDR:        |
|----------------------|---------------------------------------------------|----------|-------------------------|-------------|------------------|-------------|
| SP_PIR_KEYWORDS      | er-golgi transport                                | 27       | 1.192                   | 1.60E-06    | 2.774            | 0.002407149 |
| GOTERM_BP            | GO:0048193-Golgi vesicle transport                | 34       | 1.501                   | 1.62E-04    | 1.957            | 0.300731261 |
| GOTERM_BP            | GO:0006888-ER to Golgi vesicle-mediated transport | 14       | 0.618                   | 0.002274073 | 2.514            | 4.14169915  |

**Annotation Cluster 9: Enrichment Score: 3.586**

| Annotation Category: | Annotation Term:                         | # genes: | % of total in category: | P-Value:    | Fold Enrichment: | FDR:        |
|----------------------|------------------------------------------|----------|-------------------------|-------------|------------------|-------------|
| GOTERM_CC            | GO:0015630-microtubule cytoskeleton      | 108      | 4.768                   | 4.44E-06    | 1.531            | 0.006663914 |
| SP_PIR_KEYWORDS      | cytoskeleton                             | 109      | 4.812                   | 4.29E-05    | 1.461            | 0.064765655 |
| GOTERM_CC            | GO:0005815-microtubule organizing center | 55       | 2.428                   | 9.68E-05    | 1.692            | 0.145329255 |
| GOTERM_CC            | GO:0005813-centrosome                    | 50       | 2.208                   | 1.06E-04    | 1.738            | 0.159772816 |
| GOTERM_CC            | GO:0005856-cytoskeleton                  | 207      | 9.139                   | 0.009044798 | 1.167            | 12.75849627 |
| GOTERM_CC            | GO:0044430-cytoskeletal part             | 145      | 6.402                   | 0.017165084 | 1.186            | 22.9021064  |

**Annotation Cluster 10: Enrichment Score: 3.437**

| Annotation Category: | Annotation Term:                                      | # genes: | % of total in category: | P-Value:    | Fold Enrichment: | FDR:        |
|----------------------|-------------------------------------------------------|----------|-------------------------|-------------|------------------|-------------|
| SP_PIR_KEYWORDS      | nucleus                                               | 687      | 30.331                  | 2.08E-22    | 1.368            | 3.13E-19    |
| SP_PIR_KEYWORDS      | Transcription                                         | 298      | 13.157                  | 7.47E-05    | 1.227            | 0.112702515 |
| SP_PIR_KEYWORDS      | transcription regulation                              | 286      | 12.627                  | 4.02E-04    | 1.204            | 0.605171681 |
| SP_PIR_KEYWORDS      | dna-binding                                           | 246      | 10.861                  | 0.028133356 | 1.123            | 34.98258999 |
| GOTERM_BP_FAT        | GO:0045449-regulation of transcription                | 375      | 16.556                  | 0.032855487 | 1.087            | 46.24265609 |
| GOTERM_MF_FAT        | GO:0003677-DNA binding                                | 334      | 14.746                  | 0.032907704 | 1.095            | 42.53892619 |
| GOTERM_BP_FAT        | GO:0006350-transcription                              | 303      | 13.377                  | 0.055385129 | 1.087            | 65.30654029 |
| GOTERM_MF_FAT        | GO:0030528-transcription regulator activity           | 216      | 9.536                   | 0.086782677 | 1.092            | 77.75792027 |
| GOTERM_BP_FAT        | GO:0051252-regulation of RNA metabolic process        | 257      | 11.347                  | 0.124800473 | 1.069            | 91.59801713 |
| GOTERM_BP_FAT        | GO:0006355-regulation of transcription, DNA-dependent | 249      | 10.993                  | 0.166881688 | 1.059            | 96.63663159 |
| GOTERM_MF_FAT        | GO:0003700-transcription factor activity              | 120      | 5.298                   | 0.812856895 | 0.940            | 100         |

**Table S2. Significant Enrichment of Gene Ontology Terms (Biological Process) in FRDA iPS Cells.**

| <b>Ontology Term:</b>                                                 | <b># of genes</b> | <b>% of total in category</b> | <b>Fold Enrichment</b> | <b>p-value</b> |
|-----------------------------------------------------------------------|-------------------|-------------------------------|------------------------|----------------|
| GO:0007049~cell cycle                                                 | 89                | 7.90                          | 1.722                  | 4.32E-07       |
| GO:0043933~macromolecular complex subunit organization                | 78                | 6.93                          | 1.649                  | 1.24E-05       |
| GO:0070271~protein complex biogenesis                                 | 60                | 5.33                          | 1.784                  | 1.55E-05       |
| GO:0006461~protein complex assembly                                   | 60                | 5.33                          | 1.784                  | 1.55E-05       |
| GO:0031397~negative regulation of protein ubiquitination              | 17                | 1.51                          | 3.449                  | 2.24E-05       |
| GO:0031400~negative regulation of protein modification process        | 22                | 1.95                          | 2.776                  | 3.43E-05       |
| GO:0065003~macromolecular complex assembly                            | 71                | 6.31                          | 1.603                  | 8.03E-05       |
| GO:0031396~regulation of protein ubiquitination                       | 19                | 1.69                          | 2.853                  | 9.38E-05       |
| GO:0022402~cell cycle process                                         | 62                | 5.51                          | 1.648                  | 1.16E-04       |
| GO:0006281~DNA repair                                                 | 37                | 3.29                          | 1.956                  | 1.42E-04       |
| GO:0006259~DNA metabolic process                                      | 56                | 4.97                          | 1.662                  | 2.09E-04       |
| GO:0051259~protein oligomerization                                    | 26                | 2.31                          | 2.244                  | 2.14E-04       |
| GO:0016126~sterol biosynthetic process                                | 10                | 0.89                          | 4.290                  | 3.59E-04       |
| GO:0032269~negative regulation of cellular protein metabolic proces   | 26                | 2.31                          | 2.169                  | 3.64E-04       |
| GO:0051444~negative regulation of ubiquitin-protein ligase activity   | 14                | 1.24                          | 3.137                  | 4.04E-04       |
| GO:0051352~negative regulation of ligase activity                     | 14                | 1.24                          | 3.137                  | 4.04E-04       |
| GO:0006354~RNA elongation                                             | 12                | 1.07                          | 3.533                  | 4.32E-04       |
| GO:0000278~mitotic cell cycle                                         | 43                | 3.82                          | 1.745                  | 4.72E-04       |
| GO:0006974~response to DNA damage stimulus                            | 43                | 3.82                          | 1.731                  | 5.57E-04       |
| GO:0051248~negative regulation of protein metabolic process           | 26                | 2.31                          | 2.088                  | 6.48E-04       |
| GO:0006368~RNA elongation from RNA polymerase II promoter             | 11                | 0.98                          | 3.441                  | 0.00104        |
| GO:0051436~negative regulation of ubiquitin-protein ligase activity d | 13                | 1.15                          | 3.003                  | 0.0010613      |
| GO:0006695~cholesterol biosynthetic process                           | 8                 | 0.71                          | 4.620                  | 0.0012103      |
| GO:0046394~carboxylic acid biosynthetic process                       | 22                | 1.95                          | 2.131                  | 0.0014335      |
| GO:0016053~organic acid biosynthetic process                          | 22                | 1.95                          | 2.131                  | 0.0014335      |
| GO:0008610~lipid biosynthetic process                                 | 37                | 3.29                          | 1.720                  | 0.0016089      |
| GO:0051438~regulation of ubiquitin-protein ligase activity            | 14                | 1.24                          | 2.695                  | 0.0017841      |
| GO:0006412~translation                                                | 37                | 3.29                          | 1.678                  | 0.0024638      |
| GO:0051340~regulation of ligase activity                              | 14                | 1.24                          | 2.595                  | 0.0025271      |
| GO:0043542~endothelial cell migration                                 | 7                 | 0.62                          | 4.777                  | 0.0025273      |
| GO:0016192~vesicle-mediated transport                                 | 57                | 5.06                          | 1.486                  | 0.0026147      |
| GO:0016125~sterol metabolic process                                   | 16                | 1.42                          | 2.379                  | 0.0026938      |
| GO:0006631~fatty acid metabolic process                               | 25                | 2.22                          | 1.896                  | 0.0031497      |
| GO:0031145~anaphase-promoting complex-dependent proteasomal           | 12                | 1.07                          | 2.772                  | 0.0034676      |
| GO:0008104~protein localization                                       | 80                | 7.10                          | 1.362                  | 0.003851       |
| GO:0032268~regulation of cellular protein metabolic process           | 48                | 4.26                          | 1.520                  | 0.0038695      |

|                                                                    |    |      |       |           |
|--------------------------------------------------------------------|----|------|-------|-----------|
| GO:0051260~protein homooligomerization                             | 15 | 1.33 | 2.371 | 0.0039524 |
| GO:0001101~response to acid                                        | 7  | 0.62 | 4.379 | 0.0040674 |
| GO:0045184~establishment of protein localization                   | 71 | 6.31 | 1.386 | 0.0043489 |
| GO:0043534~blood vessel endothelial cell migration                 | 5  | 0.44 | 6.825 | 0.0044002 |
| GO:0032434~regulation of proteasomal ubiquitin-dependent protein c | 5  | 0.44 | 6.825 | 0.0044002 |
| GO:0051726~regulation of cell cycle                                | 36 | 3.20 | 1.633 | 0.0044286 |
| GO:0007411~axon guidance                                           | 16 | 1.42 | 2.245 | 0.0047158 |
| GO:0010605~negative regulation of macromolecule metabolic proces   | 68 | 6.04 | 1.391 | 0.0049039 |
| GO:0015031~protein transport                                       | 70 | 6.22 | 1.379 | 0.0053541 |
| GO:0034637~cellular carbohydrate biosynthetic process              | 12 | 1.07 | 2.611 | 0.0055498 |
| GO:0006888~ER to Golgi vesicle-mediated transport                  | 9  | 0.80 | 3.217 | 0.0057974 |
| GO:0008652~cellular amino acid biosynthetic process                | 10 | 0.89 | 2.944 | 0.005946  |
| GO:0016054~organic acid catabolic process                          | 16 | 1.42 | 2.164 | 0.0066472 |
| GO:0046395~carboxylic acid catabolic process                       | 16 | 1.42 | 2.164 | 0.0066472 |
| GO:0001568~blood vessel development                                | 28 | 2.49 | 1.716 | 0.0067366 |
| GO:0022403~cell cycle phase                                        | 42 | 3.73 | 1.523 | 0.0068625 |
| GO:0007281~germ cell development                                   | 15 | 1.33 | 2.230 | 0.0068668 |
| GO:0048514~blood vessel morphogenesis                              | 25 | 2.22 | 1.779 | 0.0070162 |
| GO:0007059~chromosome segregation                                  | 13 | 1.15 | 2.410 | 0.0070358 |
| GO:0008203~cholesterol metabolic process                           | 14 | 1.24 | 2.285 | 0.0076787 |
| GO:0006352~transcription initiation                                | 13 | 1.15 | 2.352 | 0.0085363 |
| GO:0031330~negative regulation of cellular catabolic process       | 6  | 0.53 | 4.504 | 0.0086279 |
| GO:0001944~vasculature development                                 | 28 | 2.49 | 1.675 | 0.0091997 |
| GO:0031398~positive regulation of protein ubiquitination           | 13 | 1.15 | 2.324 | 0.0093747 |
| GO:0016337~cell-cell adhesion                                      | 30 | 2.66 | 1.632 | 0.0097536 |
| GO:0044271~nitrogen compound biosynthetic process                  | 34 | 3.02 | 1.571 | 0.0100825 |
| GO:0006694~steroid biosynthetic process                            | 13 | 1.15 | 2.296 | 0.0102756 |
| GO:0016051~carbohydrate biosynthetic process                       | 15 | 1.33 | 2.105 | 0.0112841 |
| GO:0006301~postreplication repair                                  | 4  | 0.36 | 7.507 | 0.0127603 |
| GO:0009206~purine ribonucleoside triphosphate biosynthetic proces  | 14 | 1.24 | 2.145 | 0.0128355 |
| GO:0006006~glucose metabolic process                               | 19 | 1.69 | 1.865 | 0.0130287 |
| GO:0000718~nucleotide-excision repair, DNA damage removal          | 6  | 0.53 | 4.095 | 0.0131243 |
| GO:0009141~nucleoside triphosphate metabolic process               | 17 | 1.51 | 1.948 | 0.0133271 |
| GO:0006007~glucose catabolic process                               | 10 | 0.89 | 2.589 | 0.0137629 |
| GO:0009145~purine nucleoside triphosphate biosynthetic process     | 14 | 1.24 | 2.123 | 0.0139067 |
| GO:0009201~ribonucleoside triphosphate biosynthetic process        | 14 | 1.24 | 2.123 | 0.0139067 |
| GO:0009063~cellular amino acid catabolic process                   | 11 | 0.98 | 2.429 | 0.01395   |
| GO:0006367~transcription initiation from RNA polymerase II promote | 11 | 0.98 | 2.429 | 0.01395   |
| GO:0006754~ATP biosynthetic process                                | 13 | 1.15 | 2.193 | 0.0145649 |
| GO:0051258~protein polymerization                                  | 9  | 0.80 | 2.758 | 0.0147162 |
| GO:0019320~hexose catabolic process                                | 11 | 0.98 | 2.394 | 0.0153737 |

|                                                                   |    |      |        |           |
|-------------------------------------------------------------------|----|------|--------|-----------|
| GO:0006928~cell motion                                            | 45 | 4.00 | 1.422  | 0.0161083 |
| GO:0046907~intracellular transport                                | 59 | 5.24 | 1.348  | 0.0162339 |
| GO:0006414~translational elongation                               | 14 | 1.24 | 2.081  | 0.0162532 |
| GO:0019318~hexose metabolic process                               | 22 | 1.95 | 1.720  | 0.0168584 |
| GO:0010498~proteasomal protein catabolic process                  | 14 | 1.24 | 2.061  | 0.0175336 |
| GO:0009142~nucleoside triphosphate biosynthetic process           | 14 | 1.24 | 2.061  | 0.0175336 |
| GO:0043161~proteasomal ubiquitin-dependent protein catabolic proc | 14 | 1.24 | 2.061  | 0.0175336 |
| GO:0043086~negative regulation of catalytic activity              | 29 | 2.58 | 1.572  | 0.0177719 |
| GO:0051270~regulation of cell motion                              | 22 | 1.95 | 1.711  | 0.0177764 |
| GO:0009309~amine biosynthetic process                             | 12 | 1.07 | 2.224  | 0.0179549 |
| GO:0046164~alcohol catabolic process                              | 12 | 1.07 | 2.224  | 0.0179549 |
| GO:0060284~regulation of cell development                         | 23 | 2.04 | 1.685  | 0.0179551 |
| GO:0046365~monosaccharide catabolic process                       | 11 | 0.98 | 2.326  | 0.0185413 |
| GO:0050678~regulation of epithelial cell proliferation            | 11 | 0.98 | 2.326  | 0.0185413 |
| GO:0040008~regulation of growth                                   | 34 | 3.02 | 1.497  | 0.0192802 |
| GO:0006090~pyruvate metabolic process                             | 8  | 0.71 | 2.860  | 0.0196854 |
| GO:0046034~ATP metabolic process                                  | 14 | 1.24 | 2.002  | 0.0218342 |
| GO:0045669~positive regulation of osteoblast differentiation      | 6  | 0.53 | 3.603  | 0.0224605 |
| GO:0031399~regulation of protein modification process             | 30 | 2.66 | 1.527  | 0.0225502 |
| GO:0006366~transcription from RNA polymerase II promoter          | 25 | 2.22 | 1.604  | 0.0228482 |
| GO:0005996~monosaccharide metabolic process                       | 24 | 2.13 | 1.623  | 0.0229606 |
| GO:0043200~response to amino acid stimulus                        | 5  | 0.44 | 4.416  | 0.0230646 |
| GO:0009205~purine ribonucleoside triphosphate metabolic process   | 15 | 1.33 | 1.925  | 0.0232245 |
| GO:0044092~negative regulation of molecular function              | 33 | 2.93 | 1.483  | 0.0239168 |
| GO:0000212~meiotic spindle organization                           | 3  | 0.27 | 11.261 | 0.0242389 |
| GO:0007346~regulation of mitotic cell cycle                       | 18 | 1.60 | 1.778  | 0.0243404 |
| GO:0033554~cellular response to stress                            | 51 | 4.53 | 1.353  | 0.0245091 |
| GO:0009199~ribonucleoside triphosphate metabolic process          | 15 | 1.33 | 1.909  | 0.0248012 |
| GO:0044275~cellular carbohydrate catabolic process                | 12 | 1.07 | 2.120  | 0.0248907 |
| GO:0000087~M phase of mitotic cell cycle                          | 24 | 2.13 | 1.609  | 0.0251886 |
| GO:0000079~regulation of cyclin-dependent protein kinase activity | 9  | 0.80 | 2.502  | 0.0254039 |
| GO:0042476~odontogenesis                                          | 9  | 0.80 | 2.502  | 0.0254039 |
| GO:0009057~macromolecule catabolic process                        | 67 | 5.95 | 1.288  | 0.0254582 |
| GO:0048469~cell maturation                                        | 11 | 0.98 | 2.202  | 0.026274  |
| GO:0009069~serine family amino acid metabolic process             | 6  | 0.53 | 3.465  | 0.0263299 |
| GO:0033692~cellular polysaccharide biosynthetic process           | 6  | 0.53 | 3.465  | 0.0263299 |
| GO:0030521~androgen receptor signaling pathway                    | 7  | 0.62 | 2.919  | 0.0299099 |
| GO:0042493~response to drug                                       | 23 | 2.04 | 1.599  | 0.0304321 |
| GO:0009408~response to heat                                       | 9  | 0.80 | 2.413  | 0.0308989 |
| GO:0048285~organelle fission                                      | 24 | 2.13 | 1.574  | 0.0314842 |
| GO:0000279~M phase                                                | 32 | 2.84 | 1.460  | 0.0317405 |



|                                                                        |    |      |       |           |
|------------------------------------------------------------------------|----|------|-------|-----------|
| GO:0009144~purine nucleoside triphosphate metabolic process            | 15 | 1.33 | 1.846 | 0.0319098 |
| GO:0009310~amine catabolic process                                     | 11 | 0.98 | 2.117 | 0.0334198 |
| GO:0044265~cellular macromolecule catabolic process                    | 62 | 5.51 | 1.284 | 0.0336404 |
| GO:0007098~centrosome cycle                                            | 5  | 0.44 | 3.951 | 0.033811  |
| GO:0006096~glycolysis                                                  | 8  | 0.71 | 2.556 | 0.0345132 |
| GO:0009259~ribonucleotide metabolic process                            | 17 | 1.51 | 1.736 | 0.0352636 |
| GO:0051437~positive regulation of ubiquitin-protein ligase activity du | 10 | 0.89 | 2.208 | 0.035458  |
| GO:0009260~ribonucleotide biosynthetic process                         | 15 | 1.33 | 1.816 | 0.035973  |
| GO:0007067~mitosis                                                     | 23 | 2.04 | 1.570 | 0.0363068 |
| GO:0000280~nuclear division                                            | 23 | 2.04 | 1.570 | 0.0363068 |
| GO:0006261~DNA-dependent DNA replication                               | 9  | 0.80 | 2.330 | 0.0371569 |
| GO:0070230~positive regulation of lymphocyte apoptosis                 | 3  | 0.27 | 9.009 | 0.0386307 |
| GO:0010629~negative regulation of gene expression                      | 45 | 4.00 | 1.341 | 0.0387464 |
| GO:0006417~regulation of translation                                   | 16 | 1.42 | 1.754 | 0.0388236 |
| GO:0019439~aromatic compound catabolic process                         | 5  | 0.44 | 3.754 | 0.0401068 |
| GO:0009411~response to UV                                              | 9  | 0.80 | 2.290 | 0.0405835 |
| GO:0009150~purine ribonucleotide metabolic process                     | 16 | 1.42 | 1.741 | 0.0409987 |
| GO:0051443~positive regulation of ubiquitin-protein ligase activity    | 10 | 0.89 | 2.145 | 0.0416528 |
| GO:0032886~regulation of microtubule-based process                     | 8  | 0.71 | 2.451 | 0.0420876 |
| GO:0042475~odontogenesis of dentine-containing tooth                   | 7  | 0.62 | 2.695 | 0.0423913 |
| GO:0007265~Ras protein signal transduction                             | 13 | 1.15 | 1.859 | 0.0459424 |
| GO:0009152~purine ribonucleotide biosynthetic process                  | 14 | 1.24 | 1.797 | 0.0470635 |
| GO:0016481~negative regulation of transcription                        | 41 | 3.64 | 1.341 | 0.0479339 |
| GO:0031329~regulation of cellular catabolic process                    | 9  | 0.80 | 2.215 | 0.0480517 |
| GO:0008202~steroid metabolic process                                   | 21 | 1.87 | 1.561 | 0.0483438 |

---

**Table S3. Simple normalized data from miRNA expression analysis.**

| No. | Reporter Name  | FRDA_iPS_3816<br>Averaged Signal | FRDA_iPS_4078<br>Averaged Signal | Control_iPS_8333<br>A<br>Averaged Signal |
|-----|----------------|----------------------------------|----------------------------------|------------------------------------------|
| 1   | hsa-let-7a     | 217                              | 158                              | 400                                      |
| 2   | hsa-let-7a*    | 35                               | 6                                | 22                                       |
| 3   | hsa-let-7a-2*  | 36                               | 10                               | 44                                       |
| 4   | hsa-let-7b     | 100                              | 141                              | 166                                      |
| 5   | hsa-let-7b*    | 48                               | 16                               | 50                                       |
| 6   | hsa-let-7c     | 136                              | 120                              | 265                                      |
| 7   | hsa-let-7c*    | 33                               | 48                               | 23                                       |
| 8   | hsa-let-7d     | 141                              | 118                              | 271                                      |
| 9   | hsa-let-7d*    | 47                               | 30                               | 55                                       |
| 10  | hsa-let-7e     | 92                               | 103                              | 170                                      |
| 11  | hsa-let-7e*    | 34                               | 8                                | 20                                       |
| 12  | hsa-let-7f     | 149                              | 59                               | 348                                      |
| 13  | hsa-let-7f-1*  | 49                               | 11                               | 34                                       |
| 14  | hsa-let-7f-2*  | 37                               | 8                                | 17                                       |
| 15  | hsa-let-7g     | 62                               | 43                               | 144                                      |
| 16  | hsa-let-7g*    | 47                               | 22                               | 25                                       |
| 17  | hsa-let-7i     | 134                              | 87                               | 213                                      |
| 18  | hsa-let-7i*    | 31                               | 9                                | 21                                       |
| 19  | hsa-miR-1      | 20                               | 17                               | 21                                       |
| 20  | hsa-miR-100    | 62                               | 33                               | 65                                       |
| 21  | hsa-miR-100*   | 36                               | 12                               | 21                                       |
| 22  | hsa-miR-101    | 251                              | 30                               | 160                                      |
| 23  | hsa-miR-101*   | 69                               | 21                               | 28                                       |
| 24  | hsa-miR-103    | 466                              | 210                              | 488                                      |
| 25  | hsa-miR-103-2* | 35                               | 21                               | 33                                       |
| 26  | hsa-miR-103-as | 45                               | 12                               | 34                                       |
| 27  | hsa-miR-105    | 53                               | 20                               | 33                                       |
| 28  | hsa-miR-105*   | 13                               | 67                               | 14                                       |
| 29  | hsa-miR-106a   | 4,125                            | 332                              | 2,248                                    |
| 30  | hsa-miR-106a*  | 62                               | 8                                | 33                                       |
| 31  | hsa-miR-106b   | 358                              | 67                               | 376                                      |
| 32  | hsa-miR-106b*  | 64                               | 57                               | 66                                       |
| 33  | hsa-miR-107    | 416                              | 132                              | 450                                      |
| 34  | hsa-miR-10a    | 50                               | 47                               | 76                                       |
| 35  | hsa-miR-10a*   | 28                               | 105                              | 28                                       |
| 36  | hsa-miR-10b    | 67                               | 38                               | 77                                       |
| 37  | hsa-miR-10b*   | 34                               | 232                              | 28                                       |
| 38  | hsa-miR-1178   | 42                               | 130                              | 28                                       |
| 39  | hsa-miR-1179   | 29                               | 43                               | 31                                       |
| 40  | hsa-miR-1180   | 46                               | 113                              | 74                                       |

|                    |       |       |       |
|--------------------|-------|-------|-------|
| 41 hsa-miR-1181    | 90    | 233   | 65    |
| 42 hsa-miR-1182    | 19    | 288   | 39    |
| 43 hsa-miR-1183    | 33    | 146   | 71    |
| 44 hsa-miR-1184    | 15    | 38    | 32    |
| 45 hsa-miR-1185    | 36    | 47    | 28    |
| 46 hsa-miR-1197    | 41    | 44    | 38    |
| 47 hsa-miR-1200    | 16    | 14    | 27    |
| 48 hsa-miR-1201    | 48    | 19    | 63    |
| 49 hsa-miR-1202    | 14    | 171   | 45    |
| 50 hsa-miR-1203    | 11    | 81    | 44    |
| 51 hsa-miR-1204    | 11    | 37    | 25    |
| 52 hsa-miR-1205    | 8     | 39    | 19    |
| 53 hsa-miR-1206    | 13    | 26    | 30    |
| 54 hsa-miR-1207-3p | 1     | 23    | 23    |
| 55 hsa-miR-1207-5p | 50    | 705   | 88    |
| 56 hsa-miR-1208    | 222   | 502   | 129   |
| 57 hsa-miR-122     | 15    | 49    | 20    |
| 58 hsa-miR-122*    | 23    | 7     | 13    |
| 59 hsa-miR-1224-3p | 99    | 12    | 45    |
| 60 hsa-miR-1224-5p | 128   | 508   | 106   |
| 61 hsa-miR-1225-3p | 39    | 48    | 29    |
| 62 hsa-miR-1225-5p | 18    | 116   | 27    |
| 63 hsa-miR-1226    | 31    | 23    | 20    |
| 64 hsa-miR-1226*   | 21    | 86    | 17    |
| 65 hsa-miR-1227    | 117   | 32    | 119   |
| 66 hsa-miR-1228    | 81    | 55    | 88    |
| 67 hsa-miR-1228*   | 19    | 847   | 36    |
| 68 hsa-miR-1229    | 95    | 64    | 67    |
| 69 hsa-miR-1231    | 95    | 1,501 | 66    |
| 70 hsa-miR-1233    | 44    | 21    | 27    |
| 71 hsa-miR-1234    | 88    | 125   | 82    |
| 72 hsa-miR-1236    | 22    | 12    | 21    |
| 73 hsa-miR-1237    | 101   | 102   | 68    |
| 74 hsa-miR-1238    | 64    | 78    | 67    |
| 75 hsa-miR-124     | 38    | 89    | 71    |
| 76 hsa-miR-124*    | 18    | 49    | 25    |
| 77 hsa-miR-1243    | 24    | 71    | 16    |
| 78 hsa-miR-1244    | 18    | 79    | 46    |
| 79 hsa-miR-1245    | 22    | 41    | 17    |
| 80 hsa-miR-1246    | 1,881 | 422   | 4,061 |
| 81 hsa-miR-1247    | 59    | 22    | 36    |
| 82 hsa-miR-1248    | 32    | 13    | 22    |
| 83 hsa-miR-1249    | 185   | 107   | 116   |
| 84 hsa-miR-1250    | 18    | 54    | 16    |

|                    |       |       |       |
|--------------------|-------|-------|-------|
| 85 hsa-miR-1251    | 12    | 23    | 23    |
| 86 hsa-miR-1252    | 21    | 27    | 30    |
| 87 hsa-miR-1253    | 34    | 31    | 18    |
| 88 hsa-miR-1254    | 20    | 126   | 25    |
| 89 hsa-miR-1255a   | 32    | 100   | 21    |
| 90 hsa-miR-1255b   | 14    | 88    | 17    |
| 91 hsa-miR-1256    | 16    | 16    | 17    |
| 92 hsa-miR-1257    | 24    | 70    | 27    |
| 93 hsa-miR-1258    | 17    | 51    | 20    |
| 94 hsa-miR-1259    | 31    | 23    | 27    |
| 95 hsa-miR-125a-3p | 39    | 466   | 109   |
| 96 hsa-miR-125a-5p | 241   | 23    | 326   |
| 97 hsa-miR-125b    | 740   | 173   | 708   |
| 98 hsa-miR-125b-1* | 18    | 82    | 26    |
| 99 hsa-miR-125b-2* | 43    | 161   | 53    |
| 100 hsa-miR-126    | 116   | 54    | 90    |
| 101 hsa-miR-126*   | 25    | 12    | 36    |
| 102 hsa-miR-1260   | 272   | 189   | 173   |
| 103 hsa-miR-1261   | 33    | 41    | 33    |
| 104 hsa-miR-1262   | 27    | 71    | 25    |
| 105 hsa-miR-1263   | 29    | 35    | 35    |
| 106 hsa-miR-1264   | 40    | 12    | 23    |
| 107 hsa-miR-1265   | 29    | 63    | 32    |
| 108 hsa-miR-1266   | 40    | 116   | 29    |
| 109 hsa-miR-1267   | 31    | 14    | 38    |
| 110 hsa-miR-1268   | 136   | 1,418 | 137   |
| 111 hsa-miR-1269   | 20    | 35    | 50    |
| 112 hsa-miR-1270   | 20    | 85    | 36    |
| 113 hsa-miR-1271   | 27    | 30    | 54    |
| 114 hsa-miR-1272   | 39    | 61    | 51    |
| 115 hsa-miR-1273   | 41    | 18    | 53    |
| 116 hsa-miR-127-3p | 80    | 56    | 103   |
| 117 hsa-miR-1274a  | 93    | 20    | 79    |
| 118 hsa-miR-1274b  | 122   | 55    | 107   |
| 119 hsa-miR-1275   | 219   | 3,666 | 165   |
| 120 hsa-miR-127-5p | 82    | 65    | 25    |
| 121 hsa-miR-1276   | 34    | 58    | 29    |
| 122 hsa-miR-1277   | 44    | 4     | 32    |
| 123 hsa-miR-1278   | 36    | 11    | 21    |
| 124 hsa-miR-1279   | 31    | 2     | 26    |
| 125 hsa-miR-128    | 107   | 6     | 137   |
| 126 hsa-miR-1280   | 2,005 | 2,400 | 1,140 |
| 127 hsa-miR-1281   | 92    | 99    | 101   |
| 128 hsa-miR-1282   | 13    | 6     | 29    |

|                    |     |     |     |
|--------------------|-----|-----|-----|
| 129 hsa-miR-1283   | 29  | 9   | 37  |
| 130 hsa-miR-1284   | 120 | 13  | 44  |
| 131 hsa-miR-1285   | 26  | 94  | 57  |
| 132 hsa-miR-1286   | 22  | 73  | 32  |
| 133 hsa-miR-1287   | 16  | 59  | 35  |
| 134 hsa-miR-1288   | 33  | 49  | 34  |
| 135 hsa-miR-1289   | 37  | 47  | 33  |
| 136 hsa-miR-129*   | 52  | 54  | 37  |
| 137 hsa-miR-1290   | 91  | 91  | 167 |
| 138 hsa-miR-1291   | 35  | 76  | 33  |
| 139 hsa-miR-1292   | 59  | 198 | 57  |
| 140 hsa-miR-1293   | 31  | 81  | 32  |
| 141 hsa-miR-129-3p | 71  | 59  | 37  |
| 142 hsa-miR-1294   | 27  | 56  | 37  |
| 143 hsa-miR-1295   | 14  | 63  | 60  |
| 144 hsa-miR-129-5p | 57  | 146 | 53  |
| 145 hsa-miR-1296   | 38  | 50  | 41  |
| 146 hsa-miR-1297   | 28  | 65  | 27  |
| 147 hsa-miR-1298   | 36  | 41  | 28  |
| 148 hsa-miR-1299   | 34  | 81  | 24  |
| 149 hsa-miR-1301   | 15  | 116 | 41  |
| 150 hsa-miR-1302   | 23  | 24  | 32  |
| 151 hsa-miR-1303   | 25  | 97  | 45  |
| 152 hsa-miR-1304   | 33  | 47  | 21  |
| 153 hsa-miR-1305   | 76  | 89  | 58  |
| 154 hsa-miR-1306   | 35  | 58  | 48  |
| 155 hsa-miR-1307   | 105 | 192 | 84  |
| 156 hsa-miR-1308   | 884 | 304 | 972 |
| 157 hsa-miR-130a   | 354 | 176 | 208 |
| 158 hsa-miR-130a*  | 39  | 16  | 22  |
| 159 hsa-miR-130b   | 169 | 226 | 157 |
| 160 hsa-miR-130b*  | 67  | 23  | 88  |
| 161 hsa-miR-132    | 40  | 47  | 38  |
| 162 hsa-miR-132*   | 23  | 59  | 24  |
| 163 hsa-miR-1321   | 10  | 153 | 25  |
| 164 hsa-miR-1322   | 30  | 72  | 41  |
| 165 hsa-miR-1323   | 131 | 285 | 265 |
| 166 hsa-miR-1324   | 28  | 13  | 11  |
| 167 hsa-miR-133a   | 45  | 56  | 42  |
| 168 hsa-miR-133b   | 69  | 31  | 34  |
| 169 hsa-miR-134    | 43  | 235 | 388 |
| 170 hsa-miR-135a   | 52  | 16  | 77  |
| 171 hsa-miR-135a*  | 20  | 143 | 20  |
| 172 hsa-miR-135b   | 76  | 18  | 70  |

|                     |     |       |     |
|---------------------|-----|-------|-----|
| 173 hsa-miR-135b*   | 21  | 84    | 32  |
| 174 hsa-miR-136     | 24  | 31    | 16  |
| 175 hsa-miR-136*    | 10  | 13    | 16  |
| 176 hsa-miR-137     | 19  | 19    | 23  |
| 177 hsa-miR-138     | 19  | 53    | 30  |
| 178 hsa-miR-138-1*  | 27  | 192   | 47  |
| 179 hsa-miR-138-2*  | 13  | 47    | 18  |
| 180 hsa-miR-139-3p  | 24  | 65    | 26  |
| 181 hsa-miR-139-5p  | 36  | 54    | 35  |
| 182 hsa-miR-140-3p  | 50  | 67    | 65  |
| 183 hsa-miR-140-5p  | 40  | 20    | 30  |
| 184 hsa-miR-141     | 40  | 48    | 16  |
| 185 hsa-miR-141*    | 19  | 29    | 11  |
| 186 hsa-miR-142-3p  | 24  | 26    | 10  |
| 187 hsa-miR-142-5p  | 35  | 8     | 22  |
| 188 hsa-miR-143     | 114 | 27    | 100 |
| 189 hsa-miR-143*    | 40  | 48    | 21  |
| 190 hsa-miR-144     | 13  | 15    | 31  |
| 191 hsa-miR-144*    | 19  | 10    | 19  |
| 192 hsa-miR-145     | 119 | 6     | 93  |
| 193 hsa-miR-145*    | 22  | 18    | 35  |
| 194 hsa-miR-1468    | 23  | 6     | 28  |
| 195 hsa-miR-1469    | 653 | 2,843 | 305 |
| 196 hsa-miR-146a    | 44  | 41    | 82  |
| 197 hsa-miR-146a*   | 14  | 2     | 23  |
| 198 hsa-miR-146b-3p | 30  | 11    | 18  |
| 199 hsa-miR-146b-5p | 47  | 23    | 74  |
| 200 hsa-miR-147     | 18  | 57    | 32  |
| 201 hsa-miR-1470    | 75  | 25    | 84  |
| 202 hsa-miR-1471    | 21  | 154   | 37  |
| 203 hsa-miR-147b    | 29  | 68    | 49  |
| 204 hsa-miR-148a    | 293 | 29    | 273 |
| 205 hsa-miR-148a*   | 40  | 33    | 47  |
| 206 hsa-miR-148b    | 87  | 17    | 94  |
| 207 hsa-miR-148b*   | 49  | 22    | 25  |
| 208 hsa-miR-149     | 59  | 21    | 64  |
| 209 hsa-miR-149*    | 278 | 7,706 | 172 |
| 210 hsa-miR-150     | 77  | 22    | 63  |
| 211 hsa-miR-150*    | 95  | 2,615 | 57  |
| 212 hsa-miR-151-3p  | 99  | 29    | 113 |
| 213 hsa-miR-151-5p  | 222 | 52    | 292 |
| 214 hsa-miR-152     | 55  | 55    | 79  |
| 215 hsa-miR-153     | 33  | 16    | 54  |
| 216 hsa-miR-1537    | 41  | 28    | 18  |

|                     |       |       |       |
|---------------------|-------|-------|-------|
| 217 hsa-miR-1538    | 48    | 97    | 63    |
| 218 hsa-miR-1539    | 22    | 25    | 47    |
| 219 hsa-miR-154     | 35    | 9     | 28    |
| 220 hsa-miR-154*    | 35    | 20    | 24    |
| 221 hsa-miR-155     | 37    | 86    | 50    |
| 222 hsa-miR-155*    | 27    | 4     | 27    |
| 223 hsa-miR-15a     | 69    | 62    | 61    |
| 224 hsa-miR-15a*    | 21    | 19    | 35    |
| 225 hsa-miR-15b     | 347   | 44    | 581   |
| 226 hsa-miR-15b*    | 38    | 13    | 96    |
| 227 hsa-miR-16      | 1,110 | 224   | 868   |
| 228 hsa-miR-16-1*   | 19    | 46    | 27    |
| 229 hsa-miR-16-2*   | 57    | 7     | 73    |
| 230 hsa-miR-17      | 4,394 | 409   | 2,276 |
| 231 hsa-miR-17*     | 28    | 53    | 35    |
| 232 hsa-miR-181a    | 45    | 63    | 52    |
| 233 hsa-miR-181a*   | 57    | 225   | 75    |
| 234 hsa-miR-181a-2* | 35    | 49    | 50    |
| 235 hsa-miR-181b    | 35    | 100   | 56    |
| 236 hsa-miR-181c    | 36    | 44    | 85    |
| 237 hsa-miR-181c*   | 38    | 120   | 392   |
| 238 hsa-miR-181d    | 36    | 77    | 56    |
| 239 hsa-miR-182     | 157   | 235   | 384   |
| 240 hsa-miR-182*    | 20    | 33    | 24    |
| 241 hsa-miR-1825    | 82    | 69    | 90    |
| 242 hsa-miR-1826    | 3,198 | 366   | 9,537 |
| 243 hsa-miR-1827    | 12    | 44    | 50    |
| 244 hsa-miR-183     | 70    | 35    | 181   |
| 245 hsa-miR-183*    | 27    | 77    | 55    |
| 246 hsa-miR-184     | 29    | 158   | 40    |
| 247 hsa-miR-185     | 44    | 70    | 61    |
| 248 hsa-miR-185*    | 24    | 12    | 34    |
| 249 hsa-miR-186     | 154   | 13    | 149   |
| 250 hsa-miR-186*    | 14    | 21    | 34    |
| 251 hsa-miR-187     | 50    | 56    | 69    |
| 252 hsa-miR-187*    | 29    | 122   | 52    |
| 253 hsa-miR-188-3p  | 7     | 40    | 35    |
| 254 hsa-miR-188-5p  | 31    | 204   | 62    |
| 255 hsa-miR-18a     | 422   | 70    | 410   |
| 256 hsa-miR-18a*    | 63    | 21    | 32    |
| 257 hsa-miR-18b     | 152   | 19    | 151   |
| 258 hsa-miR-18b*    | 61    | 14    | 43    |
| 259 hsa-miR-190     | 18    | 17    | 35    |
| 260 hsa-miR-1908    | 109   | 1,023 | 79    |

|                     |       |       |       |
|---------------------|-------|-------|-------|
| 261 hsa-miR-1909    | 20    | 75    | 63    |
| 262 hsa-miR-1909*   | 26    | 79    | 51    |
| 263 hsa-miR-190b    | 16    | 17    | 39    |
| 264 hsa-miR-191     | 187   | 45    | 216   |
| 265 hsa-miR-191*    | 53    | 34    | 53    |
| 266 hsa-miR-1910    | 45    | 29    | 46    |
| 267 hsa-miR-1911    | 46    | 26    | 44    |
| 268 hsa-miR-1911*   | 17    | 18    | 30    |
| 269 hsa-miR-1912    | 18    | 51    | 34    |
| 270 hsa-miR-1913    | 120   | 102   | 97    |
| 271 hsa-miR-1914    | 91    | 42    | 59    |
| 272 hsa-miR-1914*   | 53    | 174   | 50    |
| 273 hsa-miR-1915    | 1,365 | 3,770 | 664   |
| 274 hsa-miR-1915*   | 23    | 44    | 42    |
| 275 hsa-miR-192     | 53    | 56    | 73    |
| 276 hsa-miR-192*    | 17    | 26    | 19    |
| 277 hsa-miR-193a-3p | 32    | 16    | 36    |
| 278 hsa-miR-193a-5p | 111   | 1,159 | 70    |
| 279 hsa-miR-193b    | 54    | 27    | 47    |
| 280 hsa-miR-193b*   | 20    | 447   | 26    |
| 281 hsa-miR-194     | 42    | 43    | 65    |
| 282 hsa-miR-194*    | 17    | 98    | 32    |
| 283 hsa-miR-195     | 89    | 82    | 70    |
| 284 hsa-miR-195*    | 49    | 144   | 60    |
| 285 hsa-miR-196a    | 35    | 55    | 30    |
| 286 hsa-miR-196a*   | 23    | 67    | 32    |
| 287 hsa-miR-196b    | 28    | 54    | 24    |
| 288 hsa-miR-196b*   | 31    | 18    | 28    |
| 289 hsa-miR-197     | 233   | 98    | 140   |
| 290 hsa-miR-1972    | 63    | 90    | 59    |
| 291 hsa-miR-1973    | 48    | 50    | 55    |
| 292 hsa-miR-1974    | 1,097 | 161   | 1,435 |
| 293 hsa-miR-1975    | 2,223 | 114   | 1,828 |
| 294 hsa-miR-1976    | 31    | 22    | 70    |
| 295 hsa-miR-1977    | 426   | 65    | 957   |
| 296 hsa-miR-1978    | 177   | 47    | 739   |
| 297 hsa-miR-1979    | 1,203 | 161   | 1,188 |
| 298 hsa-miR-198     | 14    | 232   | 47    |
| 299 hsa-miR-199a-3p | 322   | 95    | 453   |
| 300 hsa-miR-199a-5p | 51    | 50    | 62    |
| 301 hsa-miR-199b-5p | 32    | 25    | 28    |
| 302 hsa-miR-19a     | 918   | 157   | 465   |
| 303 hsa-miR-19a*    | 41    | 56    | 52    |
| 304 hsa-miR-19b     | 3,043 | 544   | 1,273 |



|                    |       |     |       |
|--------------------|-------|-----|-------|
| 305 hsa-miR-19b-1* | 19    | 70  | 43    |
| 306 hsa-miR-19b-2* | 20    | 65  | 34    |
| 307 hsa-miR-200a   | 53    | 51  | 49    |
| 308 hsa-miR-200a*  | 33    | 59  | 23    |
| 309 hsa-miR-200b   | 124   | 66  | 125   |
| 310 hsa-miR-200b*  | 31    | 99  | 32    |
| 311 hsa-miR-200c   | 303   | 109 | 624   |
| 312 hsa-miR-200c*  | 47    | 49  | 32    |
| 313 hsa-miR-202    | 34    | 479 | 25    |
| 314 hsa-miR-202*   | 27    | 4   | 13    |
| 315 hsa-miR-203    | 45    | 61  | 35    |
| 316 hsa-miR-204    | 100   | 27  | 107   |
| 317 hsa-miR-205    | 107   | 43  | 99    |
| 318 hsa-miR-205*   | 76    | 33  | 49    |
| 319 hsa-miR-2052   | 35    | 15  | 29    |
| 320 hsa-miR-2053   | 63    | 8   | 42    |
| 321 hsa-miR-2054   | 29    | 11  | 25    |
| 322 hsa-miR-206    | 26    | 65  | 62    |
| 323 hsa-miR-208a   | 32    | 60  | 19    |
| 324 hsa-miR-208b   | 31    | 55  | 15    |
| 325 hsa-miR-20a    | 4,656 | 430 | 2,491 |
| 326 hsa-miR-20a*   | 81    | 17  | 73    |
| 327 hsa-miR-20b    | 3,180 | 215 | 1,764 |
| 328 hsa-miR-20b*   | 93    | 62  | 31    |
| 329 hsa-miR-21     | 1,916 | 453 | 4,907 |
| 330 hsa-miR-21*    | 28    | 112 | 29    |
| 331 hsa-miR-210    | 42    | 77  | 55    |
| 332 hsa-miR-211    | 24    | 14  | 38    |
| 333 hsa-miR-2110   | 18    | 77  | 37    |
| 334 hsa-miR-2113   | 36    | 40  | 43    |
| 335 hsa-miR-2114   | 101   | 50  | 70    |
| 336 hsa-miR-2114*  | 14    | 133 | 34    |
| 337 hsa-miR-2115   | 45    | 61  | 47    |
| 338 hsa-miR-2115*  | 24    | 58  | 58    |
| 339 hsa-miR-2116   | 29    | 60  | 35    |
| 340 hsa-miR-2116*  | 29    | 36  | 37    |
| 341 hsa-miR-2117   | 30    | 40  | 29    |
| 342 hsa-miR-212    | 59    | 52  | 35    |
| 343 hsa-miR-214    | 211   | 158 | 311   |
| 344 hsa-miR-214*   | 15    | 25  | 24    |
| 345 hsa-miR-215    | 51    | 53  | 50    |
| 346 hsa-miR-216a   | 31    | 39  | 22    |
| 347 hsa-miR-216b   | 24    | 44  | 20    |
| 348 hsa-miR-217    | 45    | 42  | 22    |

|                      |       |     |       |
|----------------------|-------|-----|-------|
| 349 hsa-miR-218      | 61    | 31  | 99    |
| 350 hsa-miR-218-1*   | 45    | 48  | 36    |
| 351 hsa-miR-218-2*   | 40    | 53  | 41    |
| 352 hsa-miR-219-1-3p | 33    | 45  | 26    |
| 353 hsa-miR-219-2-3p | 33    | 72  | 43    |
| 354 hsa-miR-219-5p   | 24    | 24  | 29    |
| 355 hsa-miR-22       | 80    | 81  | 72    |
| 356 hsa-miR-22*      | 27    | 44  | 32    |
| 357 hsa-miR-220a     | 44    | 19  | 27    |
| 358 hsa-miR-220b     | 38    | 18  | 17    |
| 359 hsa-miR-220c     | 21    | 59  | 22    |
| 360 hsa-miR-221      | 927   | 95  | 461   |
| 361 hsa-miR-221*     | 64    | 20  | 25    |
| 362 hsa-miR-222      | 1,052 | 139 | 528   |
| 363 hsa-miR-222*     | 56    | 26  | 25    |
| 364 hsa-miR-223      | 75    | 38  | 35    |
| 365 hsa-miR-223*     | 20    | 51  | 20    |
| 366 hsa-miR-224      | 35    | 19  | 43    |
| 367 hsa-miR-224*     | 31    | 47  | 19    |
| 368 hsa-miR-2276     | 36    | 151 | 26    |
| 369 hsa-miR-2277     | 33    | 33  | 36    |
| 370 hsa-miR-2278     | 23    | 56  | 34    |
| 371 hsa-miR-23a      | 438   | 109 | 565   |
| 372 hsa-miR-23a*     | 17    | 121 | 44    |
| 373 hsa-miR-23b      | 618   | 190 | 811   |
| 374 hsa-miR-23b*     | 18    | 27  | 29    |
| 375 hsa-miR-24       | 229   | 141 | 347   |
| 376 hsa-miR-24-1*    | 17    | 58  | 23    |
| 377 hsa-miR-24-2*    | 27    | 30  | 22    |
| 378 hsa-miR-25       | 735   | 94  | 931   |
| 379 hsa-miR-25*      | 21    | 81  | 28    |
| 380 hsa-miR-26a      | 1,128 | 199 | 1,775 |
| 381 hsa-miR-26a-1*   | 21    | 24  | 17    |
| 382 hsa-miR-26a-2*   | 33    | 12  | 28    |
| 383 hsa-miR-26b      | 224   | 55  | 463   |
| 384 hsa-miR-26b*     | 60    | 11  | 24    |
| 385 hsa-miR-27a      | 162   | 74  | 185   |
| 386 hsa-miR-27a*     | 50    | 42  | 34    |
| 387 hsa-miR-27b      | 198   | 94  | 247   |
| 388 hsa-miR-27b*     | 34    | 82  | 32    |
| 389 hsa-miR-28-3p    | 78    | 68  | 49    |
| 390 hsa-miR-28-5p    | 94    | 70  | 72    |
| 391 hsa-miR-296-3p   | 30    | 93  | 28    |
| 392 hsa-miR-296-5p   | 168   | 77  | 82    |

|                    |        |       |        |
|--------------------|--------|-------|--------|
| 393 hsa-miR-297    | 22     | 88    | 44     |
| 394 hsa-miR-298    | 31     | 68    | 24     |
| 395 hsa-miR-299-3p | 37     | 86    | 28     |
| 396 hsa-miR-299-5p | 144    | 38    | 67     |
| 397 hsa-miR-29a    | 458    | 157   | 522    |
| 398 hsa-miR-29a*   | 31     | 33    | 37     |
| 399 hsa-miR-29b    | 74     | 70    | 59     |
| 400 hsa-miR-29b-1* | 24     | 127   | 69     |
| 401 hsa-miR-29b-2* | 31     | 80    | 26     |
| 402 hsa-miR-29c    | 73     | 31    | 73     |
| 403 hsa-miR-29c*   | 34     | 11    | 36     |
| 404 hsa-miR-300    | 73     | 49    | 39     |
| 405 hsa-miR-301a   | 114    | 28    | 64     |
| 406 hsa-miR-301b   | 32     | 35    | 26     |
| 407 hsa-miR-302a   | 3,646  | 281   | 4,782  |
| 408 hsa-miR-302a*  | 4,498  | 368   | 5,459  |
| 409 hsa-miR-302b   | 14,151 | 1,525 | 22,133 |
| 410 hsa-miR-302b*  | 298    | 50    | 181    |
| 411 hsa-miR-302c   | 1,287  | 141   | 1,102  |
| 412 hsa-miR-302c*  | 191    | 106   | 272    |
| 413 hsa-miR-302d   | 9,023  | 749   | 8,866  |
| 414 hsa-miR-302d*  | 156    | 62    | 180    |
| 415 hsa-miR-302e   | 61     | 29    | 61     |
| 416 hsa-miR-302f   | 39     | 27    | 29     |
| 417 hsa-miR-30a    | 114    | 56    | 86     |
| 418 hsa-miR-30a*   | 52     | 34    | 34     |
| 419 hsa-miR-30b    | 131    | 31    | 99     |
| 420 hsa-miR-30b*   | 25     | 82    | 42     |
| 421 hsa-miR-30c    | 210    | 43    | 215    |
| 422 hsa-miR-30c-1* | 30     | 88    | 26     |
| 423 hsa-miR-30c-2* | 24     | 65    | 22     |
| 424 hsa-miR-30d    | 98     | 42    | 93     |
| 425 hsa-miR-30d*   | 28     | 46    | 20     |
| 426 hsa-miR-30e    | 85     | 31    | 76     |
| 427 hsa-miR-30e*   | 50     | 22    | 124    |
| 428 hsa-miR-31     | 223    | 66    | 222    |
| 429 hsa-miR-31*    | 24     | 15    | 31     |
| 430 hsa-miR-32     | 33     | 21    | 20     |
| 431 hsa-miR-32*    | 29     | 38    | 79     |
| 432 hsa-miR-320a   | 201    | 2,387 | 182    |
| 433 hsa-miR-320b   | 149    | 363   | 162    |
| 434 hsa-miR-320c   | 162    | 223   | 174    |
| 435 hsa-miR-320d   | 103    | 105   | 133    |
| 436 hsa-miR-323-3p | 35     | 40    | 24     |

|                    |       |     |     |
|--------------------|-------|-----|-----|
| 437 hsa-miR-323-5p | 20    | 63  | 39  |
| 438 hsa-miR-324-3p | 27    | 67  | 55  |
| 439 hsa-miR-324-5p | 41    | 62  | 59  |
| 440 hsa-miR-325    | 38    | 54  | 32  |
| 441 hsa-miR-326    | 29    | 37  | 35  |
| 442 hsa-miR-328    | 45    | 33  | 34  |
| 443 hsa-miR-329    | 39    | 19  | 21  |
| 444 hsa-miR-330-3p | 40    | 53  | 39  |
| 445 hsa-miR-330-5p | 14    | 65  | 30  |
| 446 hsa-miR-331-3p | 82    | 34  | 70  |
| 447 hsa-miR-331-5p | 22    | 48  | 33  |
| 448 hsa-miR-335    | 103   | 73  | 160 |
| 449 hsa-miR-335*   | 109   | 44  | 185 |
| 450 hsa-miR-337-3p | 23    | 10  | 32  |
| 451 hsa-miR-337-5p | 29    | 42  | 19  |
| 452 hsa-miR-338-3p | 28    | 22  | 10  |
| 453 hsa-miR-338-5p | 31    | 53  | 26  |
| 454 hsa-miR-339-3p | 28    | 59  | 24  |
| 455 hsa-miR-339-5p | 34    | 44  | 29  |
| 456 hsa-miR-33a    | 17    | 49  | 21  |
| 457 hsa-miR-33a*   | 41    | 24  | 24  |
| 458 hsa-miR-33b    | 29    | 39  | 23  |
| 459 hsa-miR-33b*   | 22    | 64  | 33  |
| 460 hsa-miR-340    | 127   | 32  | 119 |
| 461 hsa-miR-340*   | 51    | 23  | 59  |
| 462 hsa-miR-342-3p | 123   | 52  | 99  |
| 463 hsa-miR-342-5p | 27    | 59  | 18  |
| 464 hsa-miR-345    | 42    | 125 | 22  |
| 465 hsa-miR-346    | 42    | 17  | 31  |
| 466 hsa-miR-34a    | 62    | 34  | 61  |
| 467 hsa-miR-34a*   | 34    | 17  | 19  |
| 468 hsa-miR-34b    | 44    | 24  | 35  |
| 469 hsa-miR-34b*   | 31    | 31  | 12  |
| 470 hsa-miR-34c-3p | 50    | 72  | 35  |
| 471 hsa-miR-34c-5p | 39    | 75  | 48  |
| 472 hsa-miR-361-3p | 19    | 53  | 20  |
| 473 hsa-miR-361-5p | 72    | 116 | 161 |
| 474 hsa-miR-362-3p | 62    | 19  | 22  |
| 475 hsa-miR-362-5p | 48    | 83  | 42  |
| 476 hsa-miR-363    | 630   | 63  | 323 |
| 477 hsa-miR-363*   | 17    | 49  | 28  |
| 478 hsa-miR-365    | 121   | 72  | 90  |
| 479 hsa-miR-365*   | 32    | 208 | 30  |
| 480 hsa-miR-367    | 1,322 | 716 | 571 |

|                    |     |       |     |
|--------------------|-----|-------|-----|
| 481 hsa-miR-367*   | 42  | 40    | 12  |
| 482 hsa-miR-369-3p | 35  | 65    | 28  |
| 483 hsa-miR-369-5p | 29  | 44    | 25  |
| 484 hsa-miR-370    | 13  | 86    | 26  |
| 485 hsa-miR-371-3p | 49  | 71    | 91  |
| 486 hsa-miR-371-5p | 131 | 3,264 | 139 |
| 487 hsa-miR-372    | 157 | 98    | 122 |
| 488 hsa-miR-373    | 120 | 141   | 208 |
| 489 hsa-miR-373*   | 166 | 9,726 | 92  |
| 490 hsa-miR-374a   | 360 | 63    | 211 |
| 491 hsa-miR-374a*  | 36  | 38    | 13  |
| 492 hsa-miR-374b   | 600 | 88    | 480 |
| 493 hsa-miR-374b*  | 49  | 17    | 40  |
| 494 hsa-miR-375    | 38  | 66    | 63  |
| 495 hsa-miR-376a   | 10  | 70    | 23  |
| 496 hsa-miR-376a*  | 32  | 30    | 27  |
| 497 hsa-miR-376b   | 34  | 29    | 26  |
| 498 hsa-miR-376c   | 21  | 25    | 26  |
| 499 hsa-miR-377    | 25  | 28    | 35  |
| 500 hsa-miR-377*   | 32  | 62    | 36  |
| 501 hsa-miR-378    | 69  | 72    | 74  |
| 502 hsa-miR-378*   | 29  | 21    | 28  |
| 503 hsa-miR-379    | 36  | 101   | 89  |
| 504 hsa-miR-379*   | 47  | 15    | 40  |
| 505 hsa-miR-380    | 24  | 21    | 30  |
| 506 hsa-miR-380*   | 41  | 42    | 48  |
| 507 hsa-miR-381    | 41  | 55    | 22  |
| 508 hsa-miR-382    | 43  | 84    | 57  |
| 509 hsa-miR-383    | 26  | 95    | 34  |
| 510 hsa-miR-384    | 31  | 14    | 26  |
| 511 hsa-miR-409-3p | 41  | 49    | 55  |
| 512 hsa-miR-409-5p | 50  | 38    | 30  |
| 513 hsa-miR-410    | 76  | 58    | 29  |
| 514 hsa-miR-411    | 36  | 42    | 29  |
| 515 hsa-miR-411*   | 79  | 19    | 54  |
| 516 hsa-miR-412    | 70  | 20    | 24  |
| 517 hsa-miR-421    | 227 | 252   | 190 |
| 518 hsa-miR-422a   | 106 | 193   | 68  |
| 519 hsa-miR-423-3p | 61  | 46    | 34  |
| 520 hsa-miR-423-5p | 80  | 242   | 102 |
| 521 hsa-miR-424    | 65  | 17    | 56  |
| 522 hsa-miR-424*   | 123 | 920   | 67  |
| 523 hsa-miR-425    | 205 | 28    | 106 |
| 524 hsa-miR-425*   | 44  | 40    | 34  |

|                     |     |       |     |
|---------------------|-----|-------|-----|
| 525 hsa-miR-429     | 91  | 36    | 47  |
| 526 hsa-miR-431     | 34  | 43    | 30  |
| 527 hsa-miR-431*    | 22  | 84    | 31  |
| 528 hsa-miR-432     | 29  | 127   | 25  |
| 529 hsa-miR-432*    | 44  | 22    | 43  |
| 530 hsa-miR-433     | 52  | 61    | 38  |
| 531 hsa-miR-448     | 38  | 25    | 38  |
| 532 hsa-miR-449a    | 10  | 42    | 36  |
| 533 hsa-miR-449b    | 31  | 37    | 25  |
| 534 hsa-miR-449b*   | 61  | 23    | 38  |
| 535 hsa-miR-449c    | 40  | 44    | 22  |
| 536 hsa-miR-449c*   | 56  | 25    | 24  |
| 537 hsa-miR-450a    | 19  | 48    | 30  |
| 538 hsa-miR-450b-3p | 24  | 20    | 26  |
| 539 hsa-miR-450b-5p | 24  | 19    | 22  |
| 540 hsa-miR-451     | 32  | 24    | 29  |
| 541 hsa-miR-452     | 38  | 64    | 25  |
| 542 hsa-miR-452*    | 37  | 42    | 9   |
| 543 hsa-miR-453     | 8   | 41    | 26  |
| 544 hsa-miR-454     | 226 | 75    | 618 |
| 545 hsa-miR-454*    | 42  | 24    | 43  |
| 546 hsa-miR-455-3p  | 90  | 60    | 126 |
| 547 hsa-miR-455-5p  | 38  | 32    | 33  |
| 548 hsa-miR-483-3p  | 71  | 26    | 52  |
| 549 hsa-miR-483-5p  | 85  | 1,056 | 117 |
| 550 hsa-miR-484     | 97  | 81    | 73  |
| 551 hsa-miR-485-3p  | 106 | 50    | 80  |
| 552 hsa-miR-485-5p  | 22  | 79    | 16  |
| 553 hsa-miR-486-3p  | 36  | 77    | 29  |
| 554 hsa-miR-486-5p  | 50  | 31    | 33  |
| 555 hsa-miR-487a    | 35  | 48    | 17  |
| 556 hsa-miR-487b    | 54  | 53    | 31  |
| 557 hsa-miR-488     | 22  | 15    | 15  |
| 558 hsa-miR-488*    | 33  | 7     | 15  |
| 559 hsa-miR-489     | 87  | 57    | 73  |
| 560 hsa-miR-490-3p  | 46  | 31    | 27  |
| 561 hsa-miR-490-5p  | 35  | 120   | 32  |
| 562 hsa-miR-491-3p  | 45  | 13    | 24  |
| 563 hsa-miR-491-5p  | 36  | 49    | 35  |
| 564 hsa-miR-492     | 40  | 83    | 26  |
| 565 hsa-miR-493     | 33  | 75    | 32  |
| 566 hsa-miR-493*    | 35  | 40    | 50  |
| 567 hsa-miR-494     | 544 | 122   | 676 |
| 568 hsa-miR-495     | 42  | 20    | 22  |

|                      |     |     |     |
|----------------------|-----|-----|-----|
| 569 hsa-miR-496      | 35  | 12  | 26  |
| 570 hsa-miR-497      | 31  | 60  | 19  |
| 571 hsa-miR-497*     | 23  | 52  | 19  |
| 572 hsa-miR-498      | 53  | 709 | 70  |
| 573 hsa-miR-499-3p   | 32  | 51  | 12  |
| 574 hsa-miR-499-5p   | 28  | 57  | 17  |
| 575 hsa-miR-500      | 26  | 74  | 27  |
| 576 hsa-miR-500*     | 39  | 106 | 34  |
| 577 hsa-miR-501-3p   | 26  | 90  | 38  |
| 578 hsa-miR-501-5p   | 35  | 59  | 35  |
| 579 hsa-miR-502-3p   | 17  | 73  | 28  |
| 580 hsa-miR-502-5p   | 29  | 44  | 27  |
| 581 hsa-miR-503      | 18  | 166 | 25  |
| 582 hsa-miR-504      | 33  | 47  | 29  |
| 583 hsa-miR-505      | 75  | 41  | 84  |
| 584 hsa-miR-505*     | 30  | 130 | 25  |
| 585 hsa-miR-506      | 38  | 60  | 25  |
| 586 hsa-miR-507      | 23  | 31  | 24  |
| 587 hsa-miR-508-3p   | 32  | 62  | 27  |
| 588 hsa-miR-508-5p   | 19  | 59  | 22  |
| 589 hsa-miR-509-3-5p | 28  | 41  | 27  |
| 590 hsa-miR-509-3p   | 56  | 107 | 32  |
| 591 hsa-miR-509-5p   | 30  | 60  | 24  |
| 592 hsa-miR-510      | 52  | 69  | 35  |
| 593 hsa-miR-511      | 41  | 19  | 32  |
| 594 hsa-miR-512-3p   | 177 | 97  | 256 |
| 595 hsa-miR-512-5p   | 38  | 43  | 78  |
| 596 hsa-miR-513a-3p  | 45  | 19  | 28  |
| 597 hsa-miR-513a-5p  | 30  | 103 | 84  |
| 598 hsa-miR-513b     | 20  | 59  | 27  |
| 599 hsa-miR-513c     | 33  | 50  | 26  |
| 600 hsa-miR-514      | 30  | 37  | 44  |
| 601 hsa-miR-515-3p   | 80  | 72  | 63  |
| 602 hsa-miR-515-5p   | 87  | 16  | 111 |
| 603 hsa-miR-516a-3p  | 40  | 51  | 50  |
| 604 hsa-miR-516a-5p  | 26  | 58  | 50  |
| 605 hsa-miR-516b     | 83  | 80  | 63  |
| 606 hsa-miR-517*     | 35  | 62  | 63  |
| 607 hsa-miR-517a     | 157 | 51  | 268 |
| 608 hsa-miR-517b     | 137 | 53  | 251 |
| 609 hsa-miR-517c     | 101 | 44  | 91  |
| 610 hsa-miR-518a-3p  | 33  | 43  | 67  |
| 611 hsa-miR-518a-5p  | 32  | 65  | 35  |
| 612 hsa-miR-518b     | 74  | 39  | 68  |

|                     |    |     |    |
|---------------------|----|-----|----|
| 613 hsa-miR-518c    | 35 | 33  | 33 |
| 614 hsa-miR-518c*   | 47 | 67  | 53 |
| 615 hsa-miR-518d-3p | 43 | 18  | 56 |
| 616 hsa-miR-518d-5p | 81 | 71  | 88 |
| 617 hsa-miR-518e    | 41 | 18  | 61 |
| 618 hsa-miR-518e*   | 33 | 46  | 56 |
| 619 hsa-miR-518f    | 62 | 20  | 51 |
| 620 hsa-miR-518f*   | 78 | 45  | 69 |
| 621 hsa-miR-519a    | 82 | 32  | 69 |
| 622 hsa-miR-519b-3p | 65 | 32  | 56 |
| 623 hsa-miR-519c-3p | 74 | 33  | 84 |
| 624 hsa-miR-519d    | 86 | 33  | 63 |
| 625 hsa-miR-519e    | 36 | 56  | 29 |
| 626 hsa-miR-519e*   | 54 | 68  | 60 |
| 627 hsa-miR-520a-3p | 42 | 36  | 29 |
| 628 hsa-miR-520a-5p | 40 | 36  | 38 |
| 629 hsa-miR-520b    | 67 | 65  | 62 |
| 630 hsa-miR-520c-3p | 49 | 66  | 68 |
| 631 hsa-miR-520d-3p | 66 | 113 | 88 |
| 632 hsa-miR-520d-5p | 32 | 26  | 37 |
| 633 hsa-miR-520e    | 42 | 58  | 35 |
| 634 hsa-miR-520f    | 72 | 53  | 64 |
| 635 hsa-miR-520g    | 83 | 40  | 83 |
| 636 hsa-miR-520h    | 91 | 32  | 75 |
| 637 hsa-miR-521     | 31 | 27  | 31 |
| 638 hsa-miR-522     | 46 | 36  | 76 |
| 639 hsa-miR-523     | 33 | 52  | 30 |
| 640 hsa-miR-524-3p  | 48 | 51  | 80 |
| 641 hsa-miR-524-5p  | 48 | 50  | 65 |
| 642 hsa-miR-525-3p  | 29 | 42  | 29 |
| 643 hsa-miR-525-5p  | 21 | 30  | 72 |
| 644 hsa-miR-526b    | 29 | 45  | 61 |
| 645 hsa-miR-526b*   | 42 | 51  | 39 |
| 646 hsa-miR-532-3p  | 58 | 34  | 64 |
| 647 hsa-miR-532-5p  | 48 | 35  | 72 |
| 648 hsa-miR-539     | 29 | 36  | 36 |
| 649 hsa-miR-541     | 15 | 41  | 36 |
| 650 hsa-miR-541*    | 28 | 26  | 36 |
| 651 hsa-miR-542-3p  | 24 | 29  | 19 |
| 652 hsa-miR-542-5p  | 26 | 28  | 20 |
| 653 hsa-miR-543     | 20 | 19  | 12 |
| 654 hsa-miR-544     | 25 | 7   | 24 |
| 655 hsa-miR-545     | 30 | 18  | 21 |
| 656 hsa-miR-545*    | 16 | 16  | 9  |



|                     |     |       |     |
|---------------------|-----|-------|-----|
| 657 hsa-miR-548a-3p | 23  | 11    | 34  |
| 658 hsa-miR-548a-5p | 29  | 18    | 23  |
| 659 hsa-miR-548b-3p | 38  | 20    | 36  |
| 660 hsa-miR-548b-5p | 19  | 27    | 42  |
| 661 hsa-miR-548c-3p | 35  | 16    | 32  |
| 662 hsa-miR-548c-5p | 30  | 43    | 40  |
| 663 hsa-miR-548d-3p | 24  | 16    | 27  |
| 664 hsa-miR-548d-5p | 20  | 22    | 25  |
| 665 hsa-miR-548e    | 34  | 25    | 30  |
| 666 hsa-miR-548f    | 43  | 32    | 50  |
| 667 hsa-miR-548g    | 42  | 32    | 31  |
| 668 hsa-miR-548h    | 34  | 34    | 48  |
| 669 hsa-miR-548i    | 31  | 67    | 29  |
| 670 hsa-miR-548j    | 46  | 106   | 42  |
| 671 hsa-miR-548k    | 48  | 79    | 32  |
| 672 hsa-miR-548l    | 27  | 91    | 53  |
| 673 hsa-miR-548m    | 34  | 103   | 59  |
| 674 hsa-miR-548n    | 17  | 78    | 29  |
| 675 hsa-miR-548o    | 29  | 48    | 26  |
| 676 hsa-miR-548p    | 33  | 74    | 49  |
| 677 hsa-miR-548q    | 332 | 1,109 | 146 |
| 678 hsa-miR-549     | 19  | 52    | 36  |
| 679 hsa-miR-550     | 34  | 109   | 47  |
| 680 hsa-miR-550*    | 62  | 61    | 40  |
| 681 hsa-miR-551a    | 74  | 60    | 55  |
| 682 hsa-miR-551b    | 36  | 48    | 67  |
| 683 hsa-miR-551b*   | 28  | 79    | 41  |
| 684 hsa-miR-552     | 24  | 40    | 30  |
| 685 hsa-miR-553     | 31  | 28    | 32  |
| 686 hsa-miR-554     | 23  | 49    | 46  |
| 687 hsa-miR-555     | 36  | 35    | 47  |
| 688 hsa-miR-556-3p  | 29  | 46    | 53  |
| 689 hsa-miR-556-5p  | 28  | 61    | 40  |
| 690 hsa-miR-557     | 52  | 141   | 52  |
| 691 hsa-miR-558     | 26  | 175   | 22  |
| 692 hsa-miR-559     | 38  | 74    | 28  |
| 693 hsa-miR-561     | 32  | 66    | 27  |
| 694 hsa-miR-562     | 40  | 68    | 26  |
| 695 hsa-miR-563     | 31  | 91    | 33  |
| 696 hsa-miR-564     | 97  | 217   | 181 |
| 697 hsa-miR-566     | 29  | 60    | 36  |
| 698 hsa-miR-567     | 61  | 85    | 32  |
| 699 hsa-miR-568     | 29  | 26    | 89  |
| 700 hsa-miR-569     | 23  | 40    | 25  |

|                    |     |     |     |
|--------------------|-----|-----|-----|
| 701 hsa-miR-570    | 30  | 11  | 31  |
| 702 hsa-miR-571    | 37  | 52  | 35  |
| 703 hsa-miR-572    | 67  | 67  | 55  |
| 704 hsa-miR-573    | 35  | 22  | 27  |
| 705 hsa-miR-574-3p | 150 | 146 | 168 |
| 706 hsa-miR-574-5p | 221 | 163 | 588 |
| 707 hsa-miR-575    | 200 | 589 | 171 |
| 708 hsa-miR-576-3p | 14  | 58  | 16  |
| 709 hsa-miR-576-5p | 59  | 28  | 26  |
| 710 hsa-miR-577    | 14  | 20  | 21  |
| 711 hsa-miR-578    | 29  | 26  | 123 |
| 712 hsa-miR-579    | 42  | 26  | 15  |
| 713 hsa-miR-580    | 13  | 71  | 21  |
| 714 hsa-miR-581    | 30  | 21  | 19  |
| 715 hsa-miR-582-3p | 29  | 46  | 26  |
| 716 hsa-miR-582-5p | 42  | 24  | 20  |
| 717 hsa-miR-583    | 33  | 47  | 26  |
| 718 hsa-miR-584    | 35  | 112 | 32  |
| 719 hsa-miR-585    | 19  | 49  | 23  |
| 720 hsa-miR-586    | 35  | 20  | 16  |
| 721 hsa-miR-587    | 13  | 60  | 26  |
| 722 hsa-miR-588    | 12  | 80  | 27  |
| 723 hsa-miR-589    | 25  | 52  | 29  |
| 724 hsa-miR-589*   | 39  | 24  | 18  |
| 725 hsa-miR-590-3p | 14  | 39  | 17  |
| 726 hsa-miR-590-5p | 70  | 72  | 38  |
| 727 hsa-miR-591    | 25  | 20  | 14  |
| 728 hsa-miR-592    | 11  | 53  | 19  |
| 729 hsa-miR-593    | 17  | 48  | 20  |
| 730 hsa-miR-593*   | 41  | 60  | 790 |
| 731 hsa-miR-595    | 41  | 71  | 33  |
| 732 hsa-miR-596    | 121 | 95  | 67  |
| 733 hsa-miR-597    | 19  | 28  | 39  |
| 734 hsa-miR-598    | 44  | 18  | 72  |
| 735 hsa-miR-599    | 14  | 49  | 24  |
| 736 hsa-miR-600    | 33  | 21  | 33  |
| 737 hsa-miR-601    | 36  | 75  | 56  |
| 738 hsa-miR-602    | 61  | 131 | 44  |
| 739 hsa-miR-603    | 16  | 5   | 22  |
| 740 hsa-miR-604    | 27  | 126 | 35  |
| 741 hsa-miR-605    | 56  | 47  | 64  |
| 742 hsa-miR-606    | 25  | 21  | 27  |
| 743 hsa-miR-607    | 21  | 25  | 13  |
| 744 hsa-miR-608    | 33  | 164 | 32  |

|                    |       |        |     |
|--------------------|-------|--------|-----|
| 745 hsa-miR-609    | 27    | 34     | 33  |
| 746 hsa-miR-610    | 10    | 63     | 18  |
| 747 hsa-miR-611    | 36    | 59     | 32  |
| 748 hsa-miR-612    | 84    | 216    | 111 |
| 749 hsa-miR-613    | 35    | 27     | 26  |
| 750 hsa-miR-614    | 38    | 53     | 48  |
| 751 hsa-miR-615-3p | 37    | 60     | 33  |
| 752 hsa-miR-615-5p | 31    | 50     | 55  |
| 753 hsa-miR-616    | 31    | 60     | 25  |
| 754 hsa-miR-616*   | 48    | 23     | 22  |
| 755 hsa-miR-617    | 32    | 54     | 40  |
| 756 hsa-miR-618    | 35    | 19     | 13  |
| 757 hsa-miR-619    | 70    | 57     | 25  |
| 758 hsa-miR-620    | 26    | 41     | 17  |
| 759 hsa-miR-621    | 36    | 45     | 24  |
| 760 hsa-miR-622    | 69    | 115    | 30  |
| 761 hsa-miR-623    | 80    | 288    | 30  |
| 762 hsa-miR-624    | 26    | 18     | 17  |
| 763 hsa-miR-624*   | 46    | 28     | 21  |
| 764 hsa-miR-625    | 29    | 131    | 18  |
| 765 hsa-miR-625*   | 134   | 87     | 83  |
| 766 hsa-miR-626    | 29    | 49     | 16  |
| 767 hsa-miR-627    | 34    | 66     | 22  |
| 768 hsa-miR-628-3p | 29    | 120    | 55  |
| 769 hsa-miR-628-5p | 44    | 53     | 22  |
| 770 hsa-miR-629    | 35    | 121    | 31  |
| 771 hsa-miR-629*   | 134   | 508    | 73  |
| 772 hsa-miR-630    | 41    | 191    | 45  |
| 773 hsa-miR-631    | 60    | 79     | 46  |
| 774 hsa-miR-632    | 36    | 74     | 29  |
| 775 hsa-miR-633    | 39    | 36     | 28  |
| 776 hsa-miR-634    | 98    | 58     | 57  |
| 777 hsa-miR-635    | 36    | 49     | 26  |
| 778 hsa-miR-636    | 49    | 99     | 45  |
| 779 hsa-miR-637    | 80    | 1,161  | 66  |
| 780 hsa-miR-638    | 1,700 | 14,970 | 910 |
| 781 hsa-miR-639    | 23    | 53     | 20  |
| 782 hsa-miR-640    | 58    | 43     | 29  |
| 783 hsa-miR-641    | 89    | 44     | 32  |
| 784 hsa-miR-642    | 93    | 39     | 27  |
| 785 hsa-miR-643    | 40    | 52     | 31  |
| 786 hsa-miR-644    | 34    | 58     | 27  |
| 787 hsa-miR-645    | 29    | 51     | 20  |
| 788 hsa-miR-646    | 21    | 68     | 24  |

|                    |     |       |     |
|--------------------|-----|-------|-----|
| 789 hsa-miR-647    | 46  | 56    | 54  |
| 790 hsa-miR-648    | 32  | 105   | 431 |
| 791 hsa-miR-649    | 26  | 60    | 19  |
| 792 hsa-miR-650    | 66  | 242   | 122 |
| 793 hsa-miR-651    | 41  | 26    | 37  |
| 794 hsa-miR-652    | 12  | 60    | 39  |
| 795 hsa-miR-653    | 28  | 28    | 30  |
| 796 hsa-miR-654-3p | 36  | 52    | 48  |
| 797 hsa-miR-654-5p | 32  | 132   | 30  |
| 798 hsa-miR-655    | 44  | 19    | 23  |
| 799 hsa-miR-656    | 48  | 35    | 26  |
| 800 hsa-miR-657    | 95  | 28    | 60  |
| 801 hsa-miR-658    | 45  | 184   | 48  |
| 802 hsa-miR-659    | 24  | 109   | 32  |
| 803 hsa-miR-660    | 66  | 15    | 75  |
| 804 hsa-miR-661    | 36  | 30    | 46  |
| 805 hsa-miR-662    | 63  | 44    | 28  |
| 806 hsa-miR-663    | 355 | 2,651 | 241 |
| 807 hsa-miR-663b   | 31  | 60    | 36  |
| 808 hsa-miR-664    | 88  | 14    | 29  |
| 809 hsa-miR-664*   | 37  | 195   | 25  |
| 810 hsa-miR-665    | 36  | 86    | 55  |
| 811 hsa-miR-668    | 103 | 59    | 59  |
| 812 hsa-miR-670    | 31  | 62    | 20  |
| 813 hsa-miR-671-3p | 46  | 83    | 37  |
| 814 hsa-miR-671-5p | 95  | 1,609 | 72  |
| 815 hsa-miR-675    | 41  | 287   | 43  |
| 816 hsa-miR-675*   | 106 | 54    | 47  |
| 817 hsa-miR-7      | 121 | 88    | 292 |
| 818 hsa-miR-708    | 75  | 67    | 63  |
| 819 hsa-miR-708*   | 40  | 34    | 16  |
| 820 hsa-miR-7-1*   | 31  | 19    | 36  |
| 821 hsa-miR-711    | 24  | 154   | 31  |
| 822 hsa-miR-718    | 105 | 670   | 79  |
| 823 hsa-miR-7-2*   | 28  | 9     | 13  |
| 824 hsa-miR-720    | 379 | 308   | 237 |
| 825 hsa-miR-744    | 24  | 82    | 40  |
| 826 hsa-miR-744*   | 52  | 27    | 34  |
| 827 hsa-miR-758    | 36  | 28    | 21  |
| 828 hsa-miR-759    | 25  | 25    | 9   |
| 829 hsa-miR-760    | 28  | 241   | 23  |
| 830 hsa-miR-761    | 22  | 67    | 18  |
| 831 hsa-miR-762    | 948 | 7,530 | 540 |
| 832 hsa-miR-764    | 36  | 22    | 44  |

|                    |       |     |       |
|--------------------|-------|-----|-------|
| 833 hsa-miR-765    | 32    | 171 | 70    |
| 834 hsa-miR-766    | 120   | 63  | 65    |
| 835 hsa-miR-767-3p | 47    | 20  | 32    |
| 836 hsa-miR-767-5p | 30    | 21  | 23    |
| 837 hsa-miR-769-3p | 32    | 100 | 24    |
| 838 hsa-miR-769-5p | 43    | 35  | 35    |
| 839 hsa-miR-770-5p | 28    | 58  | 27    |
| 840 hsa-miR-802    | 35    | 18  | 14    |
| 841 hsa-miR-873    | 32    | 37  | 21    |
| 842 hsa-miR-874    | 123   | 904 | 156   |
| 843 hsa-miR-875-3p | 10    | 41  | 15    |
| 844 hsa-miR-875-5p | 38    | 30  | 22    |
| 845 hsa-miR-876-3p | 12    | 47  | 12    |
| 846 hsa-miR-876-5p | 17    | 29  | 13    |
| 847 hsa-miR-877    | 15    | 428 | 60    |
| 848 hsa-miR-877*   | 53    | 29  | 65    |
| 849 hsa-miR-885-3p | 9     | 250 | 22    |
| 850 hsa-miR-885-5p | 42    | 19  | 56    |
| 851 hsa-miR-886-3p | 90    | 76  | 181   |
| 852 hsa-miR-886-5p | 30    | 78  | 67    |
| 853 hsa-miR-887    | 29    | 82  | 41    |
| 854 hsa-miR-888    | 29    | 17  | 17    |
| 855 hsa-miR-888*   | 19    | 69  | 16    |
| 856 hsa-miR-889    | 13    | 42  | 5     |
| 857 hsa-miR-890    | 30    | 73  | 11    |
| 858 hsa-miR-891a   | 77    | 75  | 36    |
| 859 hsa-miR-891b   | 161   | 59  | 9     |
| 860 hsa-miR-892a   | 36    | 32  | 17    |
| 861 hsa-miR-892b   | 23    | 28  | 22    |
| 862 hsa-miR-9      | 49    | 12  | 147   |
| 863 hsa-miR-9*     | 97    | 56  | 87    |
| 864 hsa-miR-920    | 28    | 106 | 18    |
| 865 hsa-miR-921    | 21    | 110 | 24    |
| 866 hsa-miR-922    | 32    | 59  | 20    |
| 867 hsa-miR-924    | 27    | 54  | 30    |
| 868 hsa-miR-92a    | 1,387 | 156 | 1,453 |
| 869 hsa-miR-92a-1* | 23    | 74  | 53    |
| 870 hsa-miR-92a-2* | 25    | 108 | 23    |
| 871 hsa-miR-92b    | 1,000 | 128 | 1,059 |
| 872 hsa-miR-92b*   | 19    | 165 | 25    |
| 873 hsa-miR-93     | 692   | 227 | 471   |
| 874 hsa-miR-93*    | 47    | 56  | 61    |
| 875 hsa-miR-933    | 62    | 97  | 49    |
| 876 hsa-miR-934    | 33    | 93  | 19    |

|                  |     |     |     |
|------------------|-----|-----|-----|
| 877 hsa-miR-935  | 15  | 41  | 32  |
| 878 hsa-miR-936  | 53  | 305 | 77  |
| 879 hsa-miR-937  | 26  | 63  | 26  |
| 880 hsa-miR-938  | 41  | 40  | 19  |
| 881 hsa-miR-939  | 96  | 609 | 43  |
| 882 hsa-miR-940  | 171 | 234 | 143 |
| 883 hsa-miR-941  | 18  | 50  | 33  |
| 884 hsa-miR-942  | 26  | 35  | 16  |
| 885 hsa-miR-943  | 47  | 38  | 30  |
| 886 hsa-miR-944  | 38  | 63  | 11  |
| 887 hsa-miR-95   | 29  | 76  | 19  |
| 888 hsa-miR-96   | 52  | 17  | 31  |
| 889 hsa-miR-96*  | 21  | 72  | 18  |
| 890 hsa-miR-98   | 27  | 85  | 39  |
| 891 hsa-miR-99a  | 39  | 61  | 27  |
| 892 hsa-miR-99a* | 28  | 74  | 19  |
| 893 hsa-miR-99b  | 174 | 46  | 187 |
| 894 hsa-miR-99b* | 23  | 84  | 28  |

---

---

---

**Control\_IPS\_8333**

| B               | HF_1893         | HF_4078         | HF_8399         |
|-----------------|-----------------|-----------------|-----------------|
| Averaged Signal | Averaged Signal | Averaged Signal | Averaged Signal |
| 170             | 1,264           | 4,966           | 4,156           |
| 28              | 6               | 21              | 53              |
| 23              | 9               | 45              | 67              |
| 103             | 1,094           | 4,267           | 2,998           |
| 57              | 44              | 85              | 128             |
| 68              | 1,206           | 4,722           | 3,751           |
| 27              | 26              | 30              | 52              |
| 117             | 862             | 2,669           | 2,923           |
| 72              | 32              | 50              | 73              |
| 66              | 520             | 982             | 1,627           |
| 32              | 15              | 32              | 43              |
| 69              | 817             | 2,780           | 2,864           |
| 40              | 20              | 47              | 69              |
| 27              | 10              | 27              | 50              |
| 61              | 181             | 572             | 1,036           |
| 29              | 16              | 45              | 46              |
| 64              | 265             | 1,960           | 2,177           |
| 31              | 18              | 54              | 33              |
| 26              | 7               | 30              | 43              |
| 41              | 295             | 966             | 1,635           |
| 34              | 13              | 55              | 56              |
| 58              | 40              | 78              | 132             |
| 18              | 16              | 23              | 34              |
| 151             | 99              | 177             | 248             |
| 27              | 93              | 58              | 56              |
| 33              | 30              | 48              | 59              |
| 24              | 38              | 68              | 67              |
| 27              | 44              | 32              | 26              |
| 976             | 79              | 178             | 253             |
| 69              | 9               | 39              | 55              |
| 132             | 71              | 124             | 154             |
| 72              | 56              | 79              | 53              |
| 93              | 87              | 153             | 234             |
| 79              | 52              | 99              | 762             |
| 99              | 47              | 32              | 99              |
| 93              | 51              | 188             | 818             |
| 100             | 79              | 58              | 66              |
| 46              | 13              | 59              | 42              |
| 78              | 30              | 40              | 40              |
| 70              | 61              | 59              | 60              |

|       |       |     |     |
|-------|-------|-----|-----|
| 165   | 104   | 85  | 61  |
| 86    | 155   | 84  | 57  |
| 58    | 71    | 66  | 54  |
| 65    | 28    | 57  | 50  |
| 59    | 53    | 99  | 36  |
| 72    | 52    | 61  | 51  |
| 76    | 20    | 40  | 31  |
| 79    | 26    | 38  | 36  |
| 80    | 106   | 75  | 59  |
| 92    | 83    | 54  | 32  |
| 62    | 16    | 26  | 31  |
| 41    | 25    | 34  | 28  |
| 68    | 34    | 45  | 41  |
| 31    | 26    | 29  | 48  |
| 371   | 488   | 103 | 75  |
| 212   | 183   | 143 | 96  |
| 74    | 27    | 39  | 47  |
| 26    | 3     | 17  | 39  |
| 51    | 32    | 76  | 66  |
| 644   | 263   | 114 | 102 |
| 43    | 31    | 77  | 52  |
| 48    | 96    | 73  | 42  |
| 28    | 38    | 57  | 48  |
| 36    | 64    | 55  | 35  |
| 76    | 68    | 134 | 84  |
| 57    | 72    | 128 | 71  |
| 305   | 928   | 57  | 46  |
| 102   | 55    | 88  | 74  |
| 954   | 1,191 | 96  | 79  |
| 69    | 40    | 53  | 44  |
| 222   | 135   | 119 | 74  |
| 60    | 23    | 43  | 32  |
| 129   | 95    | 140 | 81  |
| 98    | 92    | 107 | 66  |
| 56    | 74    | 55  | 52  |
| 66    | 60    | 33  | 53  |
| 36    | 26    | 28  | 24  |
| 69    | 53    | 36  | 44  |
| 30    | 30    | 26  | 26  |
| 2,254 | 94    | 94  | 51  |
| 103   | 37    | 56  | 78  |
| 59    | 15    | 20  | 48  |
| 208   | 115   | 139 | 91  |
| 70    | 66    | 27  | 29  |



|       |       |       |       |
|-------|-------|-------|-------|
| 59    | 27    | 32    | 55    |
| 49    | 42    | 20    | 31    |
| 51    | 50    | 58    | 55    |
| 63    | 98    | 57    | 50    |
| 26    | 68    | 28    | 40    |
| 27    | 84    | 18    | 32    |
| 28    | 20    | 35    | 59    |
| 32    | 42    | 93    | 64    |
| 28    | 53    | 24    | 56    |
| 45    | 40    | 29    | 55    |
| 101   | 288   | 113   | 47    |
| 51    | 188   | 785   | 1,240 |
| 217   | 2,228 | 5,394 | 4,582 |
| 32    | 36    | 25    | 50    |
| 90    | 320   | 44    | 64    |
| 73    | 33    | 172   | 71    |
| 31    | 24    | 12    | 36    |
| 603   | 358   | 208   | 270   |
| 56    | 65    | 43    | 37    |
| 66    | 70    | 28    | 38    |
| 27    | 55    | 57    | 52    |
| 37    | 16    | 48    | 48    |
| 33    | 69    | 58    | 43    |
| 46    | 100   | 44    | 33    |
| 33    | 24    | 26    | 27    |
| 589   | 514   | 374   | 230   |
| 28    | 69    | 77    | 36    |
| 31    | 47    | 55    | 34    |
| 34    | 36    | 61    | 46    |
| 39    | 70    | 45    | 33    |
| 53    | 63    | 35    | 61    |
| 36    | 77    | 270   | 298   |
| 122   | 95    | 96    | 52    |
| 260   | 171   | 113   | 131   |
| 4,138 | 1,773 | 257   | 171   |
| 64    | 92    | 85    | 44    |
| 35    | 72    | 70    | 55    |
| 88    | 22    | 57    | 73    |
| 27    | 21    | 69    | 32    |
| 23    | 17    | 51    | 33    |
| 71    | 44    | 91    | 100   |
| 3,573 | 1,757 | 941   | 542   |
| 87    | 103   | 227   | 112   |
| 26    | 35    | 165   | 32    |

|     |     |     |     |
|-----|-----|-----|-----|
| 78  | 28  | 61  | 40  |
| 99  | 43  | 68  | 42  |
| 115 | 104 | 57  | 46  |
| 94  | 63  | 75  | 35  |
| 79  | 49  | 52  | 50  |
| 68  | 68  | 87  | 47  |
| 135 | 61  | 82  | 58  |
| 72  | 59  | 73  | 45  |
| 407 | 48  | 68  | 28  |
| 61  | 87  | 58  | 22  |
| 129 | 254 | 81  | 45  |
| 89  | 84  | 82  | 35  |
| 76  | 48  | 66  | 48  |
| 63  | 40  | 63  | 36  |
| 77  | 58  | 80  | 24  |
| 106 | 125 | 71  | 56  |
| 77  | 69  | 54  | 43  |
| 86  | 33  | 60  | 28  |
| 105 | 49  | 62  | 53  |
| 119 | 66  | 50  | 50  |
| 96  | 84  | 56  | 46  |
| 66  | 29  | 51  | 42  |
| 99  | 76  | 47  | 50  |
| 87  | 44  | 42  | 52  |
| 73  | 60  | 48  | 50  |
| 69  | 67  | 65  | 46  |
| 191 | 147 | 110 | 85  |
| 546 | 126 | 253 | 219 |
| 167 | 117 | 96  | 138 |
| 22  | 57  | 64  | 58  |
| 107 | 121 | 93  | 94  |
| 28  | 24  | 42  | 58  |
| 30  | 24  | 173 | 178 |
| 27  | 41  | 62  | 54  |
| 121 | 89  | 51  | 30  |
| 38  | 60  | 62  | 44  |
| 124 | 220 | 44  | 44  |
| 23  | 19  | 36  | 31  |
| 75  | 69  | 67  | 55  |
| 73  | 67  | 45  | 44  |
| 91  | 141 | 107 | 87  |
| 30  | 16  | 29  | 30  |
| 77  | 124 | 70  | 25  |
| 43  | 20  | 35  | 27  |

|       |       |       |       |
|-------|-------|-------|-------|
| 45    | 70    | 83    | 39    |
| 47    | 20    | 36    | 31    |
| 44    | 18    | 49    | 34    |
| 44    | 48    | 60    | 142   |
| 49    | 69    | 70    | 118   |
| 59    | 248   | 39    | 53    |
| 48    | 72    | 31    | 43    |
| 35    | 54    | 48    | 25    |
| 31    | 51    | 57    | 49    |
| 36    | 61    | 95    | 174   |
| 35    | 27    | 48    | 59    |
| 68    | 28    | 44    | 22    |
| 56    | 16    | 21    | 27    |
| 60    | 12    | 24    | 52    |
| 47    | 6     | 25    | 21    |
| 67    | 76    | 538   | 1,100 |
| 35    | 51    | 45    | 51    |
| 30    | 9     | 23    | 32    |
| 39    | 7     | 136   | 32    |
| 45    | 146   | 1,113 | 1,565 |
| 30    | 23    | 56    | 206   |
| 26    | 16    | 21    | 25    |
| 2,006 | 1,765 | 395   | 194   |
| 41    | 42    | 35    | 32    |
| 24    | 14    | 14    | 34    |
| 33    | 31    | 25    | 20    |
| 30    | 27    | 150   | 68    |
| 72    | 36    | 60    | 40    |
| 76    | 66    | 88    | 63    |
| 95    | 74    | 37    | 24    |
| 21    | 47    | 34    | 47    |
| 96    | 39    | 73    | 203   |
| 54    | 25    | 32    | 56    |
| 38    | 33    | 55    | 136   |
| 32    | 27    | 72    | 55    |
| 67    | 37    | 73    | 55    |
| 4,481 | 8,127 | 215   | 150   |
| 65    | 53    | 86    | 67    |
| 784   | 1,778 | 53    | 54    |
| 34    | 35    | 79    | 146   |
| 82    | 64    | 306   | 349   |
| 37    | 92    | 360   | 548   |
| 55    | 17    | 50    | 62    |
| 21    | 21    | 47    | 30    |

|       |       |       |       |
|-------|-------|-------|-------|
| 39    | 230   | 82    | 51    |
| 53    | 55    | 59    | 54    |
| 54    | 15    | 39    | 77    |
| 46    | 26    | 57    | 70    |
| 72    | 42    | 87    | 121   |
| 22    | 7     | 29    | 64    |
| 48    | 68    | 134   | 342   |
| 23    | 40    | 63    | 24    |
| 140   | 62    | 301   | 428   |
| 40    | 17    | 32    | 59    |
| 208   | 393   | 1,257 | 1,380 |
| 34    | 71    | 31    | 35    |
| 30    | 15    | 44    | 104   |
| 1,067 | 79    | 152   | 251   |
| 78    | 56    | 68    | 43    |
| 74    | 67    | 143   | 154   |
| 137   | 114   | 124   | 53    |
| 37    | 84    | 66    | 65    |
| 63    | 71    | 117   | 156   |
| 71    | 63    | 84    | 61    |
| 82    | 87    | 62    | 30    |
| 81    | 79    | 94    | 70    |
| 742   | 96    | 67    | 21    |
| 69    | 23    | 500   | 18    |
| 93    | 73    | 116   | 54    |
| 1,574 | 1,383 | 2,023 | 1,003 |
| 61    | 77    | 54    | 31    |
| 86    | 42    | 67    | 29    |
| 77    | 72    | 52    | 25    |
| 100   | 115   | 59    | 36    |
| 99    | 74    | 85    | 98    |
| 56    | 25    | 45    | 24    |
| 101   | 50    | 89    | 120   |
| 59    | 19    | 36    | 74    |
| 30    | 42    | 57    | 45    |
| 227   | 178   | 77    | 57    |
| 25    | 54    | 41    | 20    |
| 80    | 150   | 134   | 114   |
| 72    | 57    | 64    | 61    |
| 25    | 31    | 58    | 46    |
| 56    | 27    | 50    | 54    |
| 47    | 30    | 74    | 56    |
| 27    | 29    | 27    | 36    |
| 1,716 | 839   | 80    | 109   |

|       |       |       |       |
|-------|-------|-------|-------|
| 31    | 96    | 63    | 54    |
| 56    | 113   | 71    | 49    |
| 51    | 13    | 25    | 31    |
| 92    | 66    | 138   | 283   |
| 92    | 80    | 94    | 85    |
| 20    | 47    | 55    | 48    |
| 23    | 29    | 62    | 36    |
| 26    | 39    | 37    | 26    |
| 20    | 42    | 38    | 27    |
| 124   | 103   | 140   | 96    |
| 71    | 48    | 90    | 70    |
| 93    | 98    | 71    | 42    |
| 5,196 | 1,566 | 519   | 282   |
| 27    | 34    | 43    | 26    |
| 67    | 41    | 77    | 49    |
| 38    | 27    | 274   | 55    |
| 72    | 61    | 36    | 41    |
| 398   | 513   | 262   | 260   |
| 41    | 52    | 73    | 55    |
| 109   | 223   | 73    | 89    |
| 47    | 27    | 50    | 32    |
| 37    | 97    | 61    | 23    |
| 105   | 123   | 260   | 336   |
| 38    | 434   | 74    | 50    |
| 15    | 53    | 47    | 162   |
| 18    | 36    | 23    | 37    |
| 32    | 50    | 72    | 49    |
| 16    | 14    | 50    | 18    |
| 157   | 78    | 180   | 157   |
| 77    | 73    | 86    | 32    |
| 57    | 49    | 39    | 29    |
| 820   | 397   | 1,172 | 864   |
| 589   | 119   | 846   | 539   |
| 76    | 53    | 50    | 58    |
| 82    | 95    | 309   | 223   |
| 59    | 66    | 125   | 98    |
| 663   | 744   | 2,267 | 2,254 |
| 126   | 175   | 58    | 61    |
| 106   | 636   | 1,706 | 1,638 |
| 78    | 109   | 178   | 165   |
| 26    | 63    | 96    | 114   |
| 809   | 34    | 95    | 147   |
| 36    | 14    | 45    | 44    |
| 1,475 | 86    | 415   | 349   |

|       |       |       |       |
|-------|-------|-------|-------|
| 28    | 12    | 69    | 36    |
| 29    | 19    | 47    | 41    |
| 24    | 21    | 39    | 35    |
| 46    | 39    | 47    | 47    |
| 57    | 17    | 32    | 32    |
| 52    | 49    | 44    | 30    |
| 91    | 27    | 36    | 42    |
| 33    | 18    | 82    | 35    |
| 112   | 222   | 55    | 33    |
| 28    | 4     | 21    | 32    |
| 56    | 21    | 65    | 49    |
| 69    | 10    | 83    | 65    |
| 56    | 48    | 67    | 63    |
| 49    | 19    | 66    | 46    |
| 45    | 13    | 62    | 41    |
| 50    | 13    | 47    | 56    |
| 40    | 15    | 25    | 33    |
| 30    | 41    | 59    | 51    |
| 35    | 73    | 32    | 47    |
| 36    | 63    | 69    | 25    |
| 1,188 | 67    | 198   | 264   |
| 64    | 17    | 56    | 29    |
| 927   | 71    | 119   | 192   |
| 58    | 68    | 69    | 25    |
| 343   | 1,612 | 6,400 | 5,493 |
| 46    | 76    | 48    | 49    |
| 75    | 83    | 109   | 150   |
| 42    | 11    | 57    | 33    |
| 51    | 48    | 81    | 39    |
| 52    | 20    | 54    | 61    |
| 53    | 40    | 76    | 63    |
| 42    | 78    | 67    | 33    |
| 60    | 26    | 70    | 31    |
| 55    | 46    | 38    | 24    |
| 43    | 26    | 68    | 31    |
| 52    | 23    | 58    | 35    |
| 19    | 63    | 47    | 36    |
| 36    | 28    | 59    | 55    |
| 118   | 164   | 724   | 672   |
| 36    | 11    | 46    | 36    |
| 53    | 43    | 46    | 39    |
| 47    | 36    | 47    | 31    |
| 50    | 37    | 459   | 62    |
| 51    | 353   | 71    | 32    |

|     |       |       |       |
|-----|-------|-------|-------|
| 55  | 54    | 80    | 105   |
| 67  | 36    | 77    | 41    |
| 47  | 34    | 66    | 54    |
| 54  | 30    | 62    | 37    |
| 60  | 44    | 47    | 59    |
| 52  | 16    | 30    | 36    |
| 81  | 219   | 533   | 702   |
| 56  | 65    | 122   | 207   |
| 26  | 7     | 56    | 51    |
| 47  | 27    | 41    | 31    |
| 54  | 41    | 33    | 18    |
| 189 | 1,097 | 1,714 | 1,852 |
| 46  | 12    | 61    | 97    |
| 211 | 1,098 | 2,021 | 2,139 |
| 51  | 50    | 51    | 61    |
| 72  | 22    | 68    | 33    |
| 54  | 16    | 59    | 23    |
| 67  | 52    | 366   | 319   |
| 28  | 43    | 30    | 34    |
| 54  | 84    | 69    | 25    |
| 26  | 29    | 55    | 29    |
| 60  | 38    | 53    | 21    |
| 130 | 1,413 | 3,506 | 2,900 |
| 61  | 68    | 85    | 111   |
| 166 | 1,518 | 2,987 | 2,751 |
| 65  | 32    | 47    | 43    |
| 86  | 218   | 1,124 | 925   |
| 49  | 31    | 30    | 50    |
| 43  | 26    | 66    | 75    |
| 276 | 39    | 196   | 281   |
| 60  | 80    | 49    | 21    |
| 224 | 467   | 1,856 | 1,633 |
| 47  | 4     | 21    | 19    |
| 45  | 0     | 22    | 18    |
| 124 | 173   | 473   | 714   |
| 20  | 5     | 21    | 20    |
| 70  | 235   | 759   | 944   |
| 60  | 63    | 56    | 44    |
| 100 | 262   | 573   | 860   |
| 34  | 64    | 66    | 78    |
| 28  | 54    | 68    | 77    |
| 56  | 64    | 88    | 145   |
| 56  | 65    | 76    | 37    |
| 166 | 94    | 133   | 77    |

|       |       |       |       |
|-------|-------|-------|-------|
| 57    | 49    | 53    | 42    |
| 41    | 59    | 58    | 32    |
| 44    | 48    | 69    | 40    |
| 87    | 61    | 111   | 172   |
| 114   | 1,722 | 1,852 | 2,713 |
| 46    | 49    | 59    | 107   |
| 72    | 258   | 101   | 259   |
| 54    | 48    | 117   | 159   |
| 36    | 51    | 28    | 48    |
| 67    | 473   | 103   | 291   |
| 21    | 13    | 28    | 34    |
| 51    | 70    | 27    | 38    |
| 56    | 27    | 50    | 68    |
| 35    | 32    | 29    | 34    |
| 980   | 26    | 32    | 35    |
| 1,070 | 52    | 36    | 39    |
| 8,735 | 14    | 25    | 35    |
| 92    | 26    | 64    | 35    |
| 698   | 42    | 57    | 25    |
| 78    | 81    | 37    | 38    |
| 2,447 | 55    | 31    | 35    |
| 65    | 69    | 33    | 53    |
| 74    | 26    | 41    | 51    |
| 63    | 20    | 34    | 53    |
| 72    | 60    | 125   | 206   |
| 37    | 52    | 69    | 94    |
| 125   | 61    | 168   | 247   |
| 45    | 54    | 59    | 31    |
| 110   | 90    | 127   | 197   |
| 135   | 111   | 59    | 41    |
| 30    | 79    | 63    | 42    |
| 54    | 83    | 107   | 192   |
| 21    | 57    | 63    | 29    |
| 47    | 201   | 81    | 122   |
| 23    | 38    | 77    | 97    |
| 40    | 136   | 1,324 | 707   |
| 16    | 60    | 79    | 66    |
| 43    | 20    | 23    | 31    |
| 39    | 39    | 20    | 50    |
| 801   | 988   | 461   | 391   |
| 199   | 240   | 534   | 524   |
| 201   | 218   | 551   | 546   |
| 83    | 140   | 415   | 514   |
| 29    | 74    | 62    | 40    |



|       |     |     |     |
|-------|-----|-----|-----|
| 27    | 71  | 77  | 23  |
| 49    | 115 | 76  | 66  |
| 32    | 81  | 61  | 61  |
| 29    | 42  | 29  | 22  |
| 26    | 30  | 43  | 55  |
| 62    | 51  | 78  | 42  |
| 27    | 33  | 58  | 79  |
| 54    | 57  | 69  | 52  |
| 27    | 59  | 40  | 41  |
| 51    | 53  | 51  | 65  |
| 30    | 68  | 65  | 53  |
| 66    | 54  | 37  | 41  |
| 60    | 40  | 57  | 50  |
| 35    | 23  | 83  | 156 |
| 32    | 54  | 47  | 57  |
| 43    | 18  | 22  | 25  |
| 51    | 32  | 44  | 52  |
| 24    | 66  | 65  | 26  |
| 42    | 76  | 85  | 60  |
| 47    | 50  | 27  | 31  |
| 26    | 35  | 27  | 33  |
| 51    | 48  | 38  | 45  |
| 37    | 48  | 70  | 50  |
| 41    | 18  | 34  | 74  |
| 46    | 8   | 19  | 29  |
| 54    | 65  | 109 | 119 |
| 25    | 66  | 73  | 44  |
| 64    | 81  | 68  | 49  |
| 28    | 62  | 64  | 62  |
| 42    | 61  | 89  | 129 |
| 42    | 44  | 54  | 54  |
| 26    | 40  | 31  | 57  |
| 46    | 35  | 54  | 32  |
| 46    | 41  | 31  | 44  |
| 53    | 53  | 63  | 40  |
| 42    | 40  | 54  | 35  |
| 46    | 63  | 106 | 144 |
| 20    | 16  | 57  | 34  |
| 28    | 51  | 51  | 63  |
| 98    | 45  | 69  | 57  |
| 37    | 53  | 38  | 21  |
| 66    | 92  | 129 | 303 |
| 82    | 312 | 57  | 48  |
| 2,443 | 37  | 53  | 39  |

|       |       |       |       |
|-------|-------|-------|-------|
| 42    | 24    | 66    | 53    |
| 45    | 41    | 69    | 70    |
| 22    | 47    | 66    | 56    |
| 18    | 84    | 52    | 56    |
| 31    | 50    | 64    | 32    |
| 1,227 | 2,140 | 102   | 52    |
| 74    | 72    | 71    | 38    |
| 73    | 80    | 71    | 58    |
| 815   | 6,620 | 139   | 74    |
| 68    | 58    | 71    | 87    |
| 18    | 14    | 37    | 34    |
| 87    | 67    | 101   | 145   |
| 14    | 12    | 33    | 47    |
| 23    | 37    | 70    | 46    |
| 17    | 56    | 56    | 142   |
| 20    | 16    | 31    | 60    |
| 24    | 35    | 54    | 46    |
| 22    | 67    | 127   | 262   |
| 17    | 48    | 55    | 71    |
| 26    | 55    | 56    | 48    |
| 46    | 58    | 38    | 33    |
| 26    | 21    | 20    | 21    |
| 33    | 51    | 90    | 133   |
| 33    | 20    | 42    | 79    |
| 53    | 22    | 27    | 56    |
| 28    | 27    | 27    | 19    |
| 56    | 35    | 38    | 37    |
| 57    | 61    | 114   | 110   |
| 33    | 65    | 25    | 22    |
| 25    | 8     | 17    | 26    |
| 60    | 51    | 89    | 90    |
| 29    | 44    | 36    | 31    |
| 23    | 28    | 34    | 69    |
| 63    | 53    | 37    | 97    |
| 111   | 24    | 38    | 97    |
| 45    | 24    | 30    | 25    |
| 85    | 113   | 45    | 29    |
| 88    | 88    | 40    | 25    |
| 82    | 34    | 84    | 51    |
| 169   | 126   | 151   | 160   |
| 66    | 107   | 1,103 | 1,377 |
| 135   | 1,036 | 178   | 165   |
| 75    | 26    | 104   | 109   |
| 53    | 62    | 39    | 38    |

|     |     |     |     |
|-----|-----|-----|-----|
| 29  | 23  | 25  | 22  |
| 36  | 45  | 39  | 23  |
| 25  | 51  | 25  | 20  |
| 24  | 73  | 63  | 57  |
| 28  | 31  | 32  | 15  |
| 27  | 36  | 38  | 33  |
| 66  | 25  | 27  | 20  |
| 64  | 39  | 19  | 18  |
| 29  | 32  | 31  | 24  |
| 33  | 47  | 63  | 47  |
| 41  | 66  | 35  | 27  |
| 44  | 28  | 79  | 28  |
| 36  | 23  | 46  | 88  |
| 42  | 18  | 14  | 11  |
| 33  | 12  | 23  | 23  |
| 29  | 11  | 24  | 10  |
| 29  | 44  | 54  | 66  |
| 32  | 26  | 20  | 6   |
| 31  | 37  | 24  | 14  |
| 81  | 44  | 105 | 123 |
| 33  | 36  | 37  | 25  |
| 68  | 72  | 126 | 191 |
| 65  | 29  | 35  | 72  |
| 71  | 38  | 68  | 53  |
| 925 | 584 | 97  | 61  |
| 122 | 81  | 77  | 86  |
| 79  | 26  | 75  | 78  |
| 64  | 52  | 31  | 23  |
| 73  | 52  | 32  | 24  |
| 72  | 52  | 644 | 35  |
| 71  | 78  | 38  | 111 |
| 40  | 66  | 46  | 86  |
| 18  | 17  | 12  | 27  |
| 24  | 7   | 16  | 18  |
| 77  | 88  | 67  | 38  |
| 17  | 29  | 30  | 40  |
| 57  | 63  | 30  | 31  |
| 18  | 5   | 22  | 22  |
| 43  | 68  | 36  | 53  |
| 74  | 117 | 35  | 23  |
| 52  | 57  | 47  | 28  |
| 49  | 44  | 79  | 184 |
| 504 | 126 | 93  | 107 |
| 60  | 29  | 36  | 132 |

|     |     |    |    |
|-----|-----|----|----|
| 25  | 20  | 9  | 22 |
| 35  | 39  | 28 | 71 |
| 25  | 29  | 19 | 27 |
| 250 | 469 | 92 | 98 |
| 28  | 32  | 22 | 29 |
| 17  | 15  | 17 | 24 |
| 26  | 42  | 24 | 17 |
| 36  | 65  | 22 | 42 |
| 32  | 91  | 20 | 21 |
| 46  | 28  | 21 | 21 |
| 19  | 57  | 11 | 18 |
| 71  | 33  | 19 | 26 |
| 81  | 124 | 52 | 80 |
| 53  | 13  | 11 | 15 |
| 61  | 28  | 30 | 61 |
| 68  | 89  | 14 | 8  |
| 65  | 27  | 58 | 45 |
| 58  | 15  | 14 | 26 |
| 27  | 17  | 24 | 30 |
| 22  | 85  | 39 | 30 |
| 24  | 70  | 37 | 7  |
| 23  | 53  | 33 | 29 |
| 15  | 71  | 31 | 19 |
| 37  | 84  | 31 | 23 |
| 43  | 47  | 25 | 33 |
| 67  | 61  | 33 | 25 |
| 25  | 62  | 20 | 20 |
| 28  | 42  | 19 | 8  |
| 150 | 73  | 29 | 8  |
| 65  | 36  | 28 | 15 |
| 52  | 43  | 61 | 26 |
| 31  | 43  | 30 | 17 |
| 20  | 21  | 14 | 35 |
| 49  | 15  | 13 | 45 |
| 28  | 17  | 27 | 28 |
| 24  | 26  | 18 | 17 |
| 38  | 24  | 29 | 36 |
| 23  | 28  | 18 | 19 |
| 42  | 22  | 31 | 27 |
| 52  | 23  | 14 | 25 |
| 61  | 23  | 22 | 27 |
| 23  | 12  | 28 | 22 |
| 52  | 47  | 22 | 25 |
| 63  | 22  | 36 | 35 |

|    |     |    |    |
|----|-----|----|----|
| 17 | 22  | 27 | 25 |
| 60 | 70  | 18 | 24 |
| 34 | 9   | 13 | 27 |
| 44 | 68  | 34 | 23 |
| 19 | 26  | 39 | 15 |
| 56 | 73  | 25 | 27 |
| 49 | 20  | 25 | 19 |
| 77 | 57  | 22 | 24 |
| 59 | 24  | 32 | 20 |
| 66 | 19  | 20 | 24 |
| 56 | 15  | 54 | 22 |
| 65 | 37  | 34 | 31 |
| 43 | 33  | 25 | 27 |
| 77 | 63  | 16 | 20 |
| 30 | 34  | 39 | 27 |
| 31 | 35  | 21 | 7  |
| 42 | 47  | 22 | 34 |
| 55 | 51  | 40 | 22 |
| 39 | 42  | 33 | 22 |
| 38 | 113 | 24 | 18 |
| 47 | 24  | 60 | 22 |
| 39 | 32  | 31 | 31 |
| 71 | 32  | 32 | 27 |
| 36 | 33  | 23 | 23 |
| 32 | 25  | 23 | 11 |
| 37 | 47  | 27 | 10 |
| 42 | 35  | 31 | 9  |
| 28 | 45  | 36 | 18 |
| 41 | 46  | 19 | 18 |
| 49 | 28  | 21 | 8  |
| 43 | 32  | 16 | 6  |
| 42 | 46  | 21 | 19 |
| 56 | 42  | 35 | 25 |
| 49 | 43  | 45 | 30 |
| 38 | 39  | 31 | 30 |
| 33 | 35  | 15 | 57 |
| 31 | 74  | 16 | 17 |
| 22 | 46  | 45 | 22 |
| 29 | 25  | 40 | 90 |
| 31 | 28  | 18 | 18 |
| 26 | 23  | 20 | 19 |
| 15 | 17  | 13 | 15 |
| 24 | 16  | 13 | 13 |
| 17 | 4   | 12 | 20 |

|     |     |     |     |
|-----|-----|-----|-----|
| 18  | 16  | 10  | 14  |
| 24  | 17  | 9   | 35  |
| 41  | 17  | 16  | 24  |
| 25  | 23  | 7   | 26  |
| 19  | 2   | 15  | 24  |
| 30  | 18  | 19  | 36  |
| 20  | 2   | 13  | 36  |
| 25  | 13  | 20  | 32  |
| 23  | 24  | 10  | 28  |
| 29  | 24  | 12  | 40  |
| 15  | 28  | 12  | 22  |
| 117 | 52  | 30  | 80  |
| 24  | 34  | 6   | 29  |
| 33  | 46  | 23  | 27  |
| 31  | 53  | 11  | 28  |
| 24  | 30  | 10  | 27  |
| 126 | 23  | 43  | 128 |
| 25  | 22  | 6   | 22  |
| 20  | 19  | 21  | 20  |
| 57  | 35  | 11  | 27  |
| 426 | 393 | 245 | 129 |
| 21  | 22  | 9   | 24  |
| 62  | 83  | 20  | 28  |
| 47  | 48  | 19  | 29  |
| 57  | 13  | 21  | 38  |
| 15  | 11  | 3   | 25  |
| 55  | 79  | 18  | 15  |
| 21  | 38  | 11  | 12  |
| 15  | 89  | 17  | 24  |
| 20  | 53  | 25  | 23  |
| 19  | 49  | 19  | 55  |
| 30  | 27  | 20  | 30  |
| 29  | 33  | 25  | 21  |
| 63  | 171 | 30  | 36  |
| 28  | 287 | 35  | 46  |
| 22  | 73  | 16  | 20  |
| 21  | 21  | 22  | 27  |
| 16  | 36  | 15  | 34  |
| 23  | 45  | 53  | 19  |
| 106 | 155 | 102 | 40  |
| 21  | 30  | 18  | 32  |
| 24  | 48  | 12  | 24  |
| 18  | 35  | 15  | 27  |
| 14  | 46  | 17  | 14  |

|     |     |     |     |
|-----|-----|-----|-----|
| 49  | 16  | 8   | 23  |
| 69  | 57  | 11  | 25  |
| 92  | 67  | 42  | 33  |
| 67  | 47  | 19  | 17  |
| 583 | 372 | 179 | 227 |
| 142 | 91  | 159 | 133 |
| 419 | 238 | 96  | 70  |
| 56  | 51  | 50  | 18  |
| 50  | 14  | 21  | 24  |
| 27  | 18  | 14  | 17  |
| 47  | 21  | 16  | 7   |
| 54  | 37  | 13  | 19  |
| 33  | 23  | 20  | 12  |
| 43  | 14  | 20  | 25  |
| 54  | 23  | 17  | 13  |
| 56  | 18  | 18  | 23  |
| 66  | 33  | 24  | 32  |
| 87  | 52  | 37  | 29  |
| 76  | 26  | 23  | 7   |
| 71  | 16  | 162 | 17  |
| 78  | 21  | 22  | 29  |
| 46  | 29  | 19  | 22  |
| 26  | 35  | 26  | 22  |
| 35  | 24  | 15  | 20  |
| 39  | 12  | 8   | 23  |
| 70  | 35  | 24  | 36  |
| 37  | 41  | 28  | 14  |
| 55  | 24  | 9   | 21  |
| 53  | 37  | 24  | 27  |
| 47  | 34  | 25  | 27  |
| 52  | 39  | 34  | 31  |
| 74  | 60  | 70  | 73  |
| 67  | 32  | 45  | 27  |
| 32  | 9   | 18  | 51  |
| 72  | 40  | 14  | 22  |
| 37  | 30  | 22  | 14  |
| 77  | 80  | 30  | 50  |
| 171 | 138 | 46  | 69  |
| 44  | 20  | 4   | 7   |
| 76  | 99  | 25  | 18  |
| 87  | 30  | 81  | 58  |
| 49  | 26  | 17  | 14  |
| 54  | 21  | 16  | 9   |
| 68  | 123 | 34  | 34  |

|        |       |     |     |
|--------|-------|-----|-----|
| 32     | 25    | 28  | 25  |
| 59     | 49    | 24  | 15  |
| 65     | 77    | 35  | 54  |
| 1,724  | 296   | 34  | 67  |
| 39     | 38    | 17  | 15  |
| 95     | 46    | 26  | 18  |
| 70     | 64    | 29  | 44  |
| 40     | 59    | 32  | 25  |
| 37     | 54    | 13  | 52  |
| 61     | 33    | 16  | 14  |
| 65     | 49    | 23  | 43  |
| 53     | 31    | 16  | 14  |
| 59     | 19    | 16  | 24  |
| 50     | 23    | 9   | 18  |
| 32     | 18    | 17  | 27  |
| 65     | 108   | 29  | 28  |
| 85     | 116   | 31  | 27  |
| 19     | 10    | 12  | 18  |
| 38     | 25    | 16  | 28  |
| 59     | 164   | 20  | 17  |
| 138    | 81    | 96  | 79  |
| 22     | 23    | 23  | 24  |
| 30     | 33    | 26  | 15  |
| 38     | 61    | 9   | 16  |
| 34     | 20    | 15  | 22  |
| 33     | 92    | 14  | 21  |
| 310    | 430   | 86  | 61  |
| 92     | 75    | 34  | 22  |
| 62     | 61    | 34  | 29  |
| 56     | 26    | 35  | 22  |
| 38     | 13    | 14  | 16  |
| 79     | 69    | 49  | 46  |
| 43     | 42    | 13  | 15  |
| 78     | 54    | 52  | 34  |
| 323    | 1,837 | 74  | 60  |
| 18,465 | 8,947 | 824 | 541 |
| 37     | 38    | 15  | 15  |
| 43     | 36    | 14  | 17  |
| 32     | 47    | 17  | 37  |
| 54     | 34    | 27  | 25  |
| 39     | 49    | 20  | 29  |
| 28     | 46    | 20  | 20  |
| 30     | 47    | 23  | 24  |
| 25     | 51    | 32  | 30  |



|        |       |     |     |
|--------|-------|-----|-----|
| 28     | 74    | 65  | 47  |
| 37     | 74    | 36  | 32  |
| 24     | 22    | 17  | 27  |
| 111    | 205   | 38  | 37  |
| 56     | 44    | 7   | 29  |
| 25     | 57    | 20  | 19  |
| 19     | 33    | 10  | 10  |
| 50     | 74    | 85  | 136 |
| 80     | 110   | 18  | 33  |
| 34     | 51    | 17  | 31  |
| 34     | 18    | 14  | 29  |
| 45     | 47    | 42  | 51  |
| 201    | 161   | 33  | 35  |
| 90     | 58    | 42  | 33  |
| 65     | 10    | 37  | 70  |
| 72     | 30    | 35  | 34  |
| 51     | 20    | 42  | 53  |
| 3,060  | 3,102 | 183 | 206 |
| 42     | 56    | 57  | 31  |
| 39     | 17    | 35  | 56  |
| 76     | 87    | 25  | 22  |
| 83     | 90    | 63  | 27  |
| 37     | 26    | 92  | 57  |
| 26     | 18    | 28  | 25  |
| 68     | 51    | 63  | 40  |
| 474    | 567   | 106 | 69  |
| 224    | 231   | 57  | 44  |
| 121    | 49    | 82  | 66  |
| 92     | 47    | 92  | 113 |
| 82     | 52    | 67  | 100 |
| 56     | 18    | 37  | 27  |
| 30     | 10    | 33  | 34  |
| 162    | 124   | 31  | 28  |
| 147    | 206   | 114 | 67  |
| 27     | 34    | 21  | 22  |
| 627    | 251   | 601 | 324 |
| 37     | 101   | 35  | 33  |
| 59     | 17    | 51  | 42  |
| 27     | 23    | 40  | 54  |
| 23     | 43    | 22  | 38  |
| 65     | 92    | 63  | 44  |
| 54     | 50    | 22  | 30  |
| 12,373 | 5,862 | 363 | 249 |
| 40     | 10    | 51  | 38  |

|     |     |     |     |
|-----|-----|-----|-----|
| 234 | 127 | 34  | 53  |
| 81  | 48  | 110 | 80  |
| 55  | 40  | 49  | 54  |
| 28  | 24  | 23  | 18  |
| 69  | 115 | 32  | 32  |
| 49  | 36  | 29  | 53  |
| 28  | 35  | 22  | 19  |
| 14  | 9   | 14  | 21  |
| 63  | 29  | 558 | 22  |
| 515 | 329 | 74  | 35  |
| 26  | 27  | 22  | 24  |
| 21  | 13  | 37  | 43  |
| 23  | 11  | 19  | 29  |
| 29  | 16  | 14  | 27  |
| 88  | 242 | 67  | 29  |
| 90  | 47  | 45  | 55  |
| 152 | 247 | 21  | 29  |
| 51  | 22  | 57  | 30  |
| 107 | 91  | 122 | 89  |
| 33  | 32  | 58  | 58  |
| 40  | 49  | 42  | 20  |
| 43  | 4   | 14  | 15  |
| 58  | 41  | 30  | 22  |
| 34  | 22  | 16  | 36  |
| 25  | 16  | 21  | 19  |
| 43  | 36  | 40  | 77  |
| 42  | 13  | 20  | 32  |
| 15  | 7   | 22  | 53  |
| 39  | 12  | 25  | 27  |
| 21  | 5   | 25  | 77  |
| 13  | 20  | 19  | 32  |
| 20  | 66  | 27  | 23  |
| 78  | 82  | 42  | 30  |
| 16  | 38  | 19  | 24  |
| 23  | 25  | 7   | 30  |
| 352 | 62  | 210 | 331 |
| 26  | 44  | 33  | 32  |
| 41  | 103 | 18  | 22  |
| 270 | 56  | 200 | 221 |
| 43  | 91  | 57  | 32  |
| 376 | 70  | 94  | 138 |
| 30  | 33  | 54  | 54  |
| 84  | 90  | 60  | 57  |
| 32  | 48  | 58  | 34  |

|     |     |     |     |
|-----|-----|-----|-----|
| 15  | 25  | 46  | 19  |
| 243 | 250 | 82  | 63  |
| 21  | 55  | 46  | 24  |
| 17  | 28  | 706 | 23  |
| 418 | 318 | 93  | 76  |
| 248 | 194 | 248 | 120 |
| 31  | 70  | 22  | 19  |
| 29  | 16  | 25  | 17  |
| 31  | 30  | 37  | 25  |
| 19  | 33  | 15  | 34  |
| 25  | 12  | 16  | 20  |
| 21  | 16  | 33  | 33  |
| 18  | 34  | 26  | 32  |
| 28  | 122 | 117 | 288 |
| 12  | 146 | 291 | 973 |
| 16  | 29  | 26  | 22  |
| 32  | 78  | 199 | 370 |
| 16  | 55  | 54  | 40  |

---
